# Supplementary material
Source: MDPI journal article supplement (https://www.mdpi.com/2075-163X/8/4/144)

**Sample E/JH/15/042, Feldspathic Orthopyroxenite – Orthopyroxene.**

| Mid Inter | ln(pop den) | ln(min PD) | ln(max PD) | Cry num | Vol % |
|-----------|-------------|------------|------------|---------|-------|
| 4.83      | -6.99       | -7.46      | -6.67      | 0.00205 | 13.54 |
| 3.05      | -4.61       | -4.81      | -4.44      | 0.014   | 23.21 |
| 1.92      | -2.71       | -2.83      | -2.6       | 0.0588  | 24.49 |
| 1.21      | -2.2        | -2.37      | -2.06      | 0.0618  | 6.474 |
| 0.766     | -2.7        | -3.2       | -2.36      | 0.0238  | 0.625 |
| 0.483     | Over        |            |            |         |       |
| 0.305     | Over        |            |            |         |       |
| 0.192     | Over        |            |            |         |       |
| 0.121     | Over        |            |            |         |       |
| 0.0766    | Over        |            |            |         |       |
| 0.0483    | Over        |            |            |         |       |
| 0.0305    | Over        |            |            |         |       |
| 0.0192    | Over        |            |            |         |       |
| 0.0121    | Over        |            |            |         |       |
| 0.0077    | Over        |            |            |         |       |

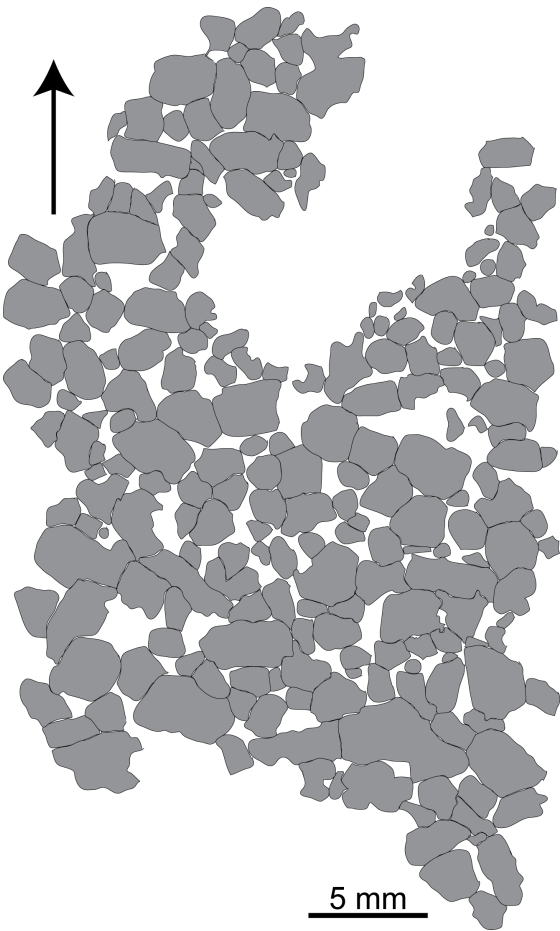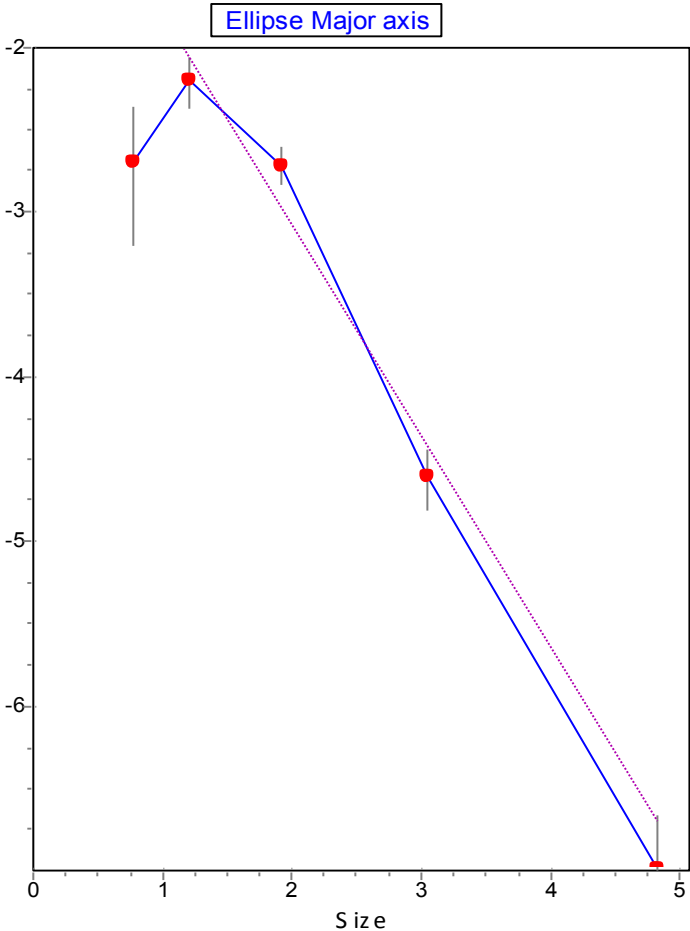

**Sample E/JH/15/043A, Feldspathic Orthopyroxenite – Orthopyroxene.**

| Mid Inter | ln(pop den) | ln(min PD) | ln(max PD) | Cry num | Vol % |
|-----------|-------------|------------|------------|---------|-------|
| 3.17      | -4.61       | -4.78      | -4.47      | 0.0145  | 26.96 |
| 2         | -2.52       | -2.61      | -2.44      | 0.0739  | 34.5  |
| 1.26      | -1.81       | -1.92      | -1.71      | 0.0947  | 11.1  |
| 0.795     | -1.68       | -1.87      | -1.52      | 0.0682  | 2.01  |
| 0.502     | Over        |            |            |         |       |
| 0.317     | Over        |            |            |         |       |
| 0.2       | Over        |            |            |         |       |
| 0.126     | Over        |            |            |         |       |
| 0.0795    | Over        |            |            |         |       |
| 0.0502    | Over        |            |            |         |       |
| 0.0317    | Over        |            |            |         |       |
| 0.02      | Over        |            |            |         |       |
| 0.0126    | Over        |            |            |         |       |

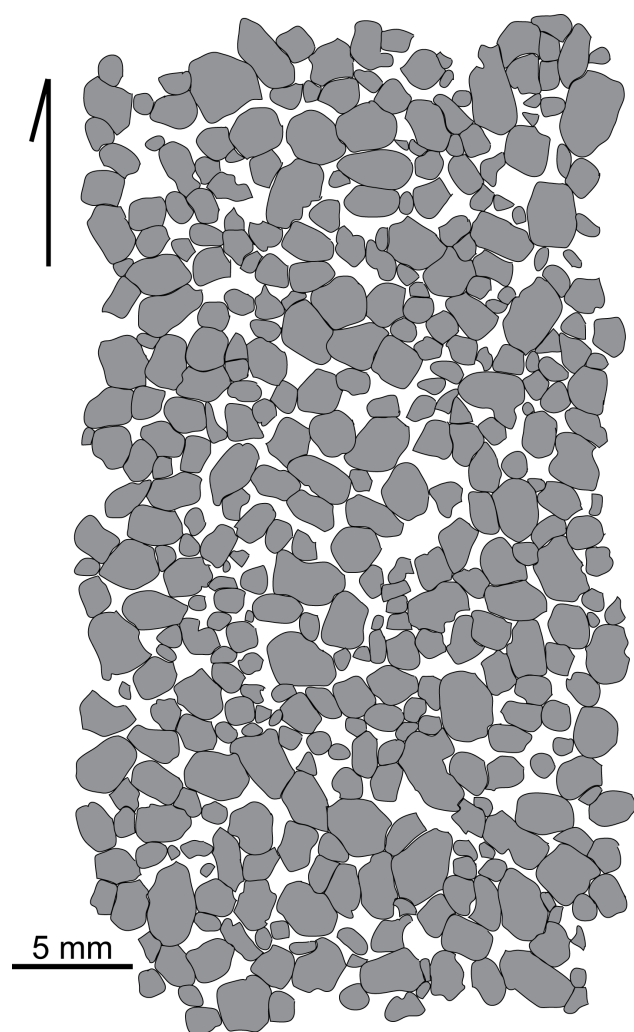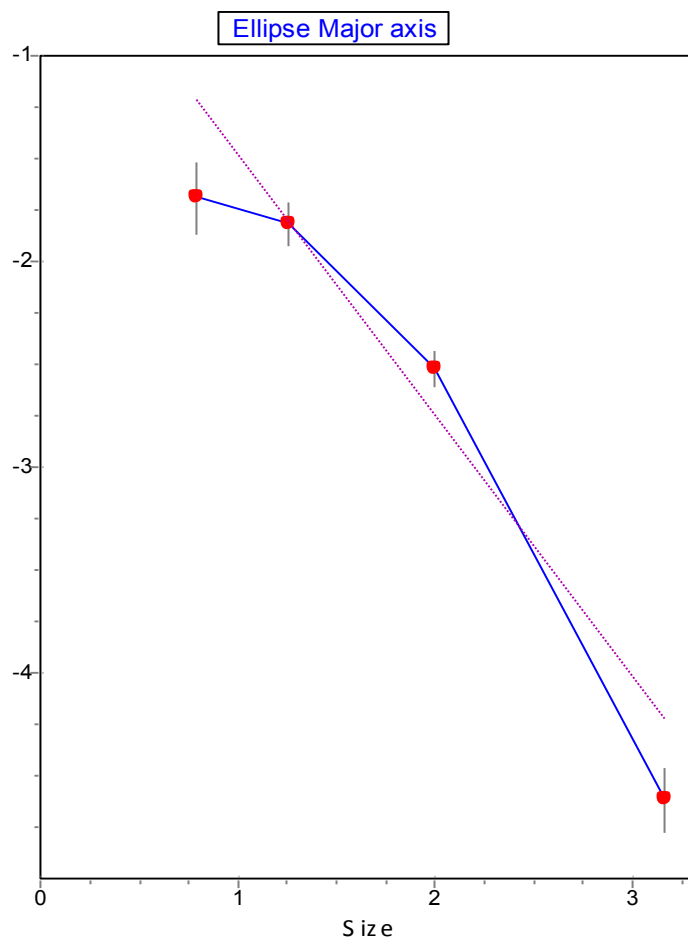

**Sample E/JH/15/045A, Feldspathic Orthopyroxenite – Orthopyroxene.**

| Mid Inter | ln(pop den) | ln(min PD) | ln(max PD) | Cry num | Vol % |
|-----------|-------------|------------|------------|---------|-------|
| 4.78      | -6.37       | -6.67      | -6.14      | 0.00377 | 24.07 |
| 3.01      | -4.39       | -4.56      | -4.24      | 0.0172  | 27.64 |
| 1.9       | -3.23       | -3.38      | -3.09      | 0.0348  | 14    |
| 1.2       | -2.78       | -2.99      | -2.6       | 0.0343  | 3.47  |
| 0.757     | -4.52       | -          | -3.63      | 0.00379 | 0.096 |
| 0.478     | Over        |            |            |         |       |
| 0.301     | Over        |            |            |         |       |
| 0.19      | Over        |            |            |         |       |
| 0.12      | Over        |            |            |         |       |
| 0.0757    | Over        |            |            |         |       |
| 0.0478    | Over        |            |            |         |       |
| 0.0301    | Over        |            |            |         |       |
| 0.019     | Over        |            |            |         |       |
| 0.012     | Over        |            |            |         |       |
| 0.0076    | Over        |            |            |         |       |

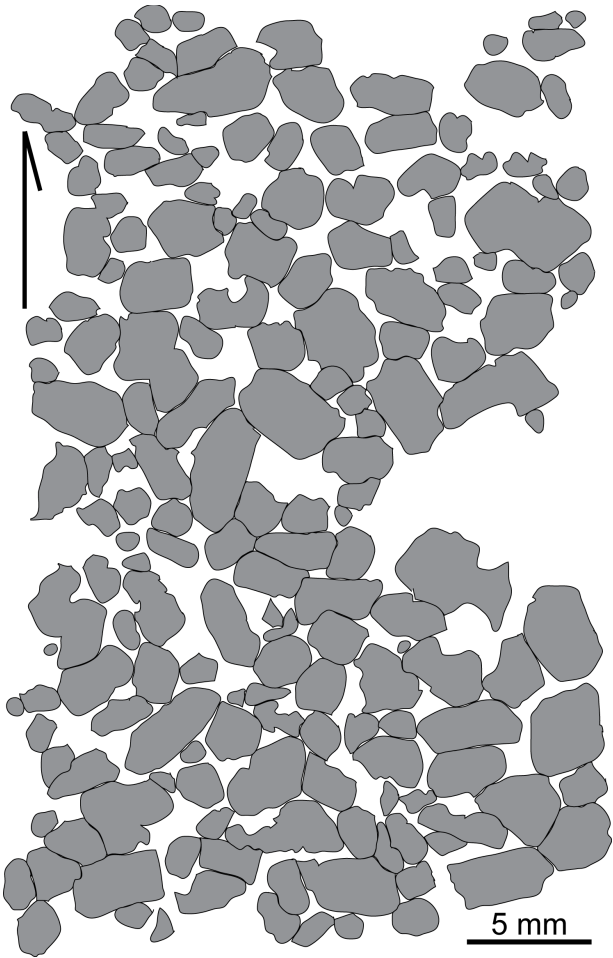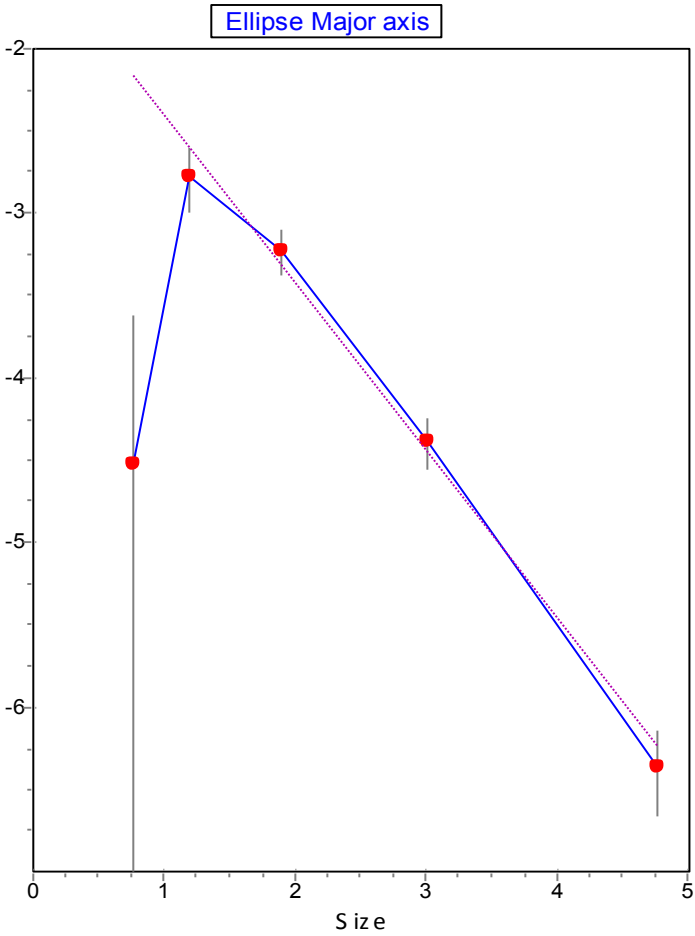

**Sample E/JH/15/046A, Feldspathic Orthopyroxenite – Orthopyroxene.**

| Mid Inter | ln(pop den) | ln(min PD) | ln(max PD) | Cry num | Vol % |
|-----------|-------------|------------|------------|---------|-------|
| 4.87      | -7.22       | -7.66      | -6.92      | 0.00164 | 11.11 |
| 3.07      | -4.37       | -4.52      | -4.24      | 0.0179  | 30.46 |
| 1.94      | -2.8        | -2.91      | -2.71      | 0.0541  | 23.12 |
| 1.22      | -1.99       | -2.1       | -1.88      | 0.0773  | 8.294 |
| 0.772     | -1.9        | -2.11      | -1.72      | 0.0534  | 1.438 |
| 0.487     | -5.09       | -          | -3.1       | 0.00138 | 0.009 |
| 0.307     | Over        |            |            |         |       |
| 0.194     | Over        |            |            |         |       |
| 0.122     | Over        |            |            |         |       |
| 0.0772    | Over        |            |            |         |       |
| 0.0487    | Over        |            |            |         |       |
| 0.0307    | Over        |            |            |         |       |
| 0.0194    | Over        |            |            |         |       |
| 0.0122    | Over        |            |            |         |       |

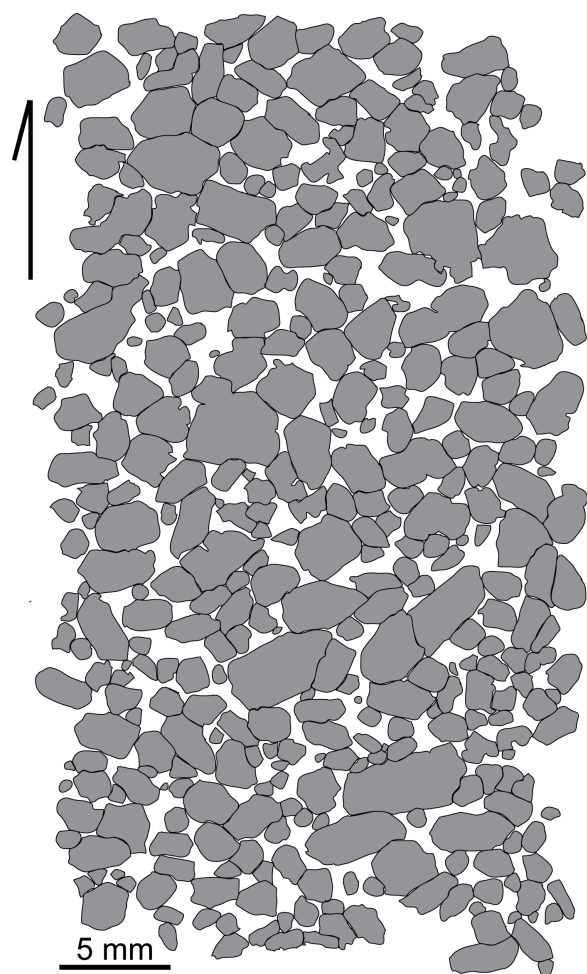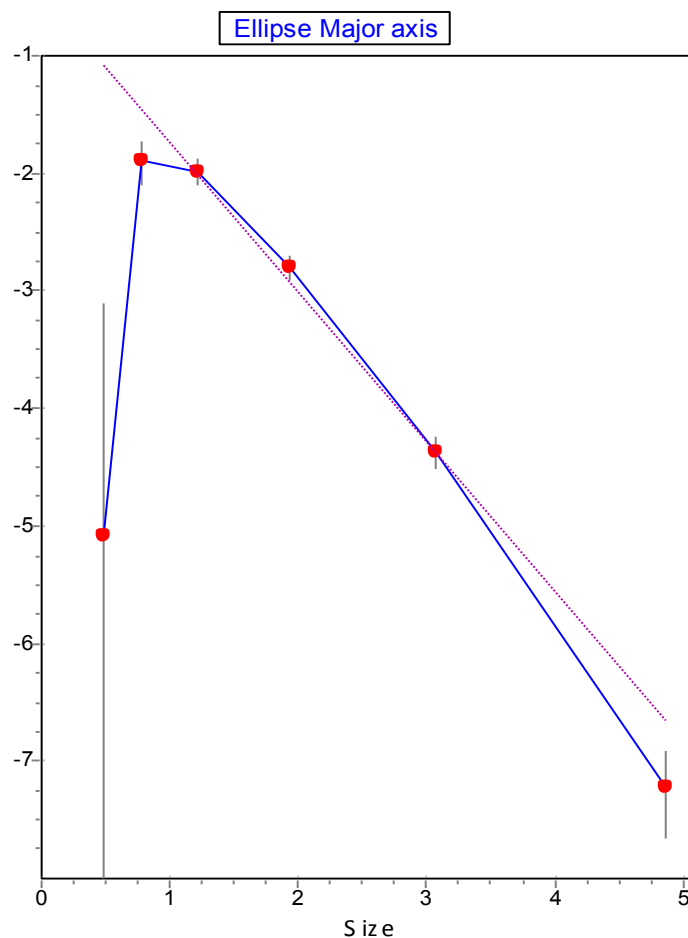

**Sample E/JH/15/067A, Chromitite – Cr-spinel, All.**

| Mid Inter | ln(pop den) | ln(min PD) | ln(max PD) | Cry num | Vol % |
|-----------|-------------|------------|------------|---------|-------|
| 1.1       | -3.56       | -4.16      | -3.19      | 0.0144  | 1.923 |
| 0.695     | -0.58       | -0.75      | -0.43      | 0.18    | 6.037 |
| 0.439     | 1.51        | 1.41       | 1.59       | 0.911   | 7.685 |
| 0.277     | 3.35        | 3.29       | 3.41       | 3.63    | 7.699 |
| 0.175     | 4.82        | 4.78       | 4.87       | 10      | 5.332 |
| 0.11      | 6.06        | 6.02       | 6.1        | 21.7    | 2.901 |
| 0.0695    | 6.63        | 6.58       | 6.68       | 24.2    | 0.812 |
| 0.0439    | 4.27        | 3.17       | 4.78       | 1.44    | 0.012 |
| 0.0277    | Over        |            |            |         |       |
| 0.0175    | Over        |            |            |         |       |
| 0.011     | Over        |            |            |         |       |
| 0.007     | Over        |            |            |         |       |
| 0.0044    | Over        |            |            |         |       |
| 0.0028    |             |            |            |         |       |
| 0.0017    | Over        |            |            |         |       |

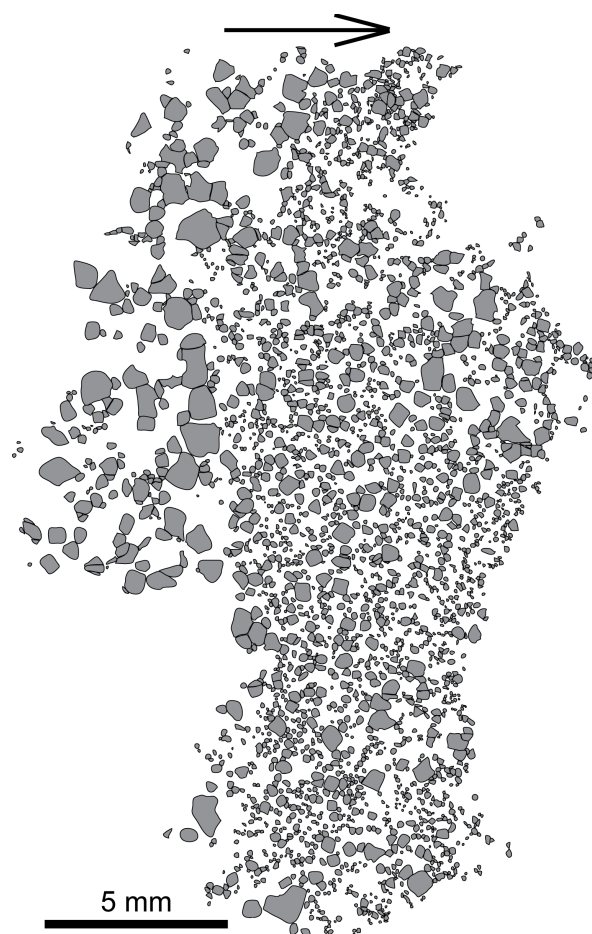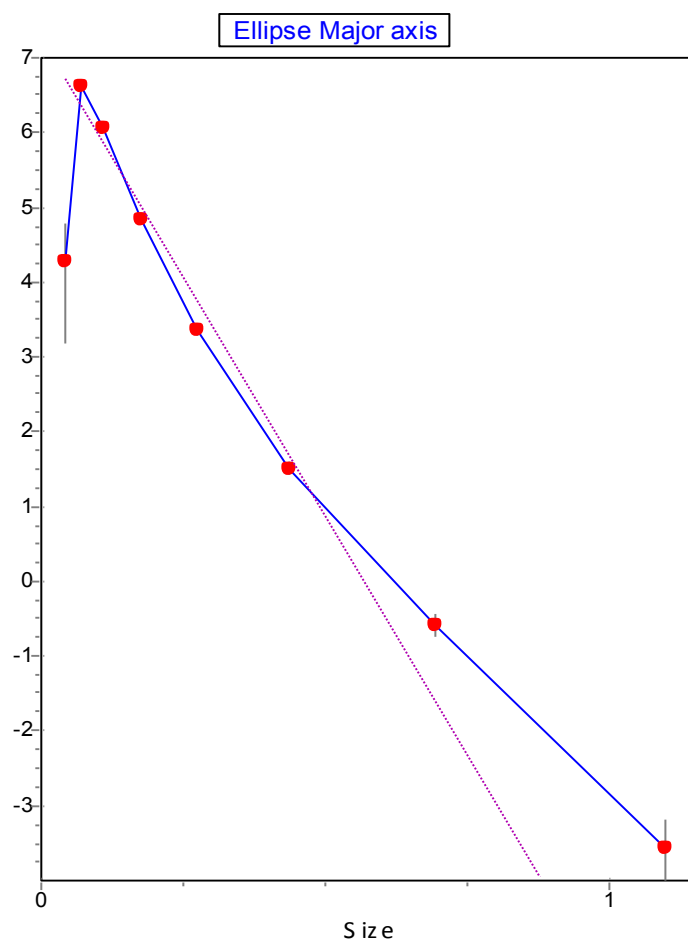

**Sample E/JH/15/067A, Chromitite – Cr-spinel, Base.**

| Mid Inter | ln(pop den) | ln(min PD) | ln(max PD) | Cry num | Vol % |
|-----------|-------------|------------|------------|---------|-------|
| 1.1       | -2.73       | -3.59      | -2.27      | 0.0331  | 4.454 |
| 0.696     | 0.48        | 0.28       | 0.65       | 0.519   | 17.52 |
| 0.439     | 1.58        | 1.38       | 1.74       | 0.979   | 8.307 |
| 0.277     | 2.73        | 2.56       | 2.88       | 1.96    | 4.17  |
| 0.175     | 3.51        | 3.31       | 3.67       | 2.69    | 1.442 |
| 0.11      | 4.02        | 3.75       | 4.23       | 2.83    | 0.379 |
| 0.0696    | 2.57        | -          | 3.46       | 0.418   | 0.014 |
| 0.0439    | Over        |            |            |         |       |
| 0.0277    | Over        |            |            |         |       |
| 0.0175    | Over        |            |            |         |       |
| 0.011     | Over        |            |            |         |       |
| 0.007     | Over        |            |            |         |       |
| 0.0044    | Over        |            |            |         |       |
| 0.0028    | Over        |            |            |         |       |
| 0.0017    | Over        |            |            |         |       |

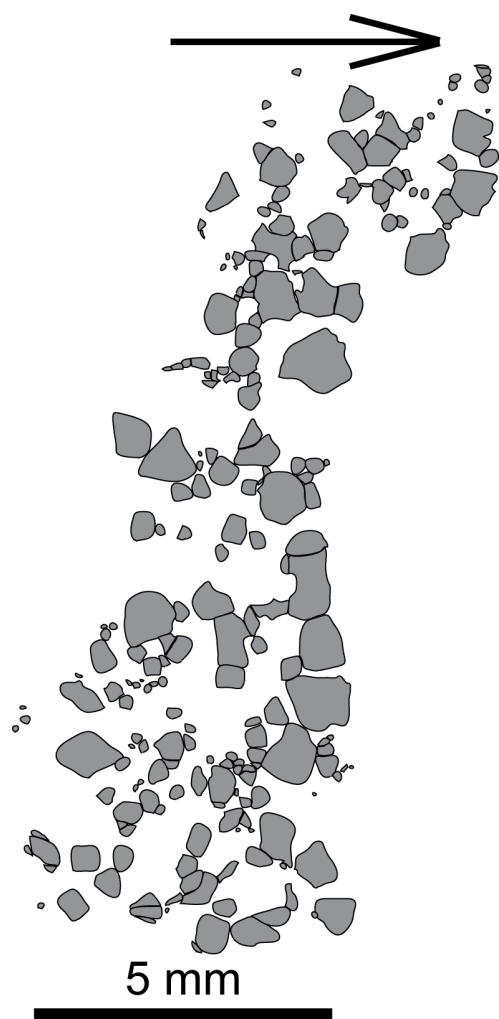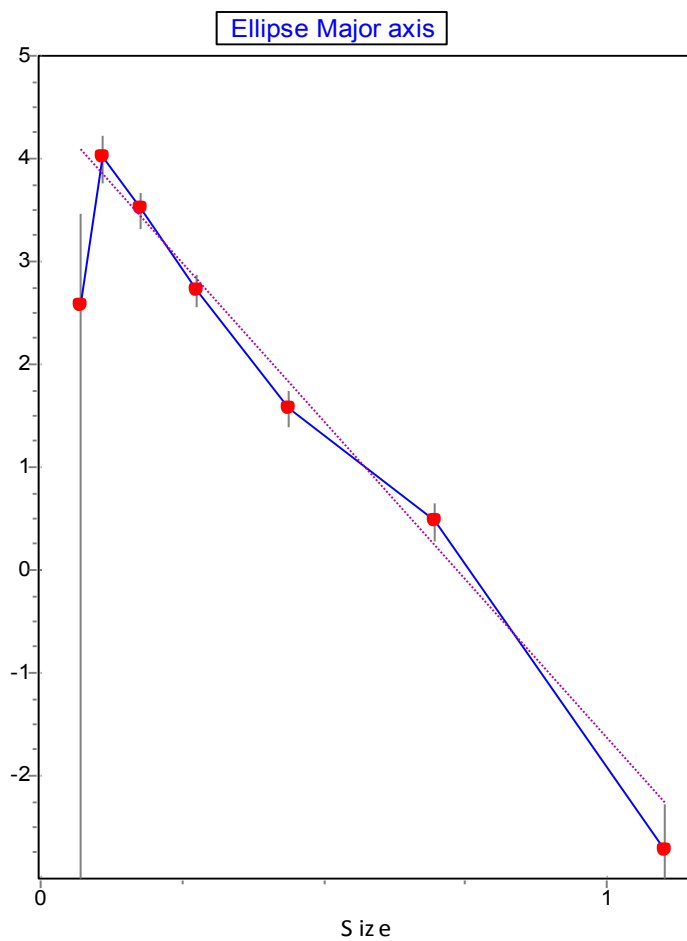

**Sample E/JH/15/067A, Chromitite – Cr-spinel, Top.**

| Mid Inter | ln(pop den) | ln(min PD) | ln(max PD) | Cry num | Vol % |
|-----------|-------------|------------|------------|---------|-------|
| 1.1       | -4.18       | -5.4       | -3.64      | 0.00779 | 1.039 |
| 0.695     | -1.67       | -2.06      | -1.39      | 0.0603  | 2.02  |
| 0.438     | 1.48        | 1.37       | 1.58       | 0.887   | 7.472 |
| 0.277     | 3.5         | 3.44       | 3.56       | 4.23    | 8.938 |
| 0.174     | 5.05        | 5          | 5.1        | 12.6    | 6.671 |
| 0.11      | 6.33        | 6.29       | 6.37       | 28.5    | 3.798 |
| 0.0695    | 6.93        | 6.88       | 6.97       | 32.6    | 1.091 |
| 0.0438    | 4.56        | 3.5        | 5.07       | 1.94    | 0.016 |
| 0.0277    | Over        |            |            |         |       |
| 0.0174    | Over        |            |            |         |       |
| 0.011     | Over        |            |            |         |       |
| 0.0069    | Over        |            |            |         |       |
| 0.0044    | Over        |            |            |         |       |
| 0.0028    |             |            |            |         |       |
| 0.0017    | Over        |            |            |         |       |

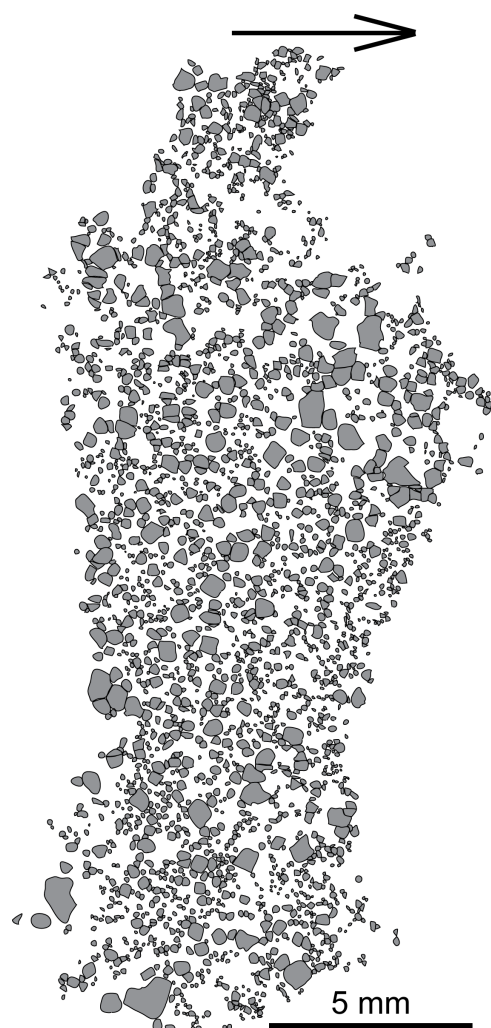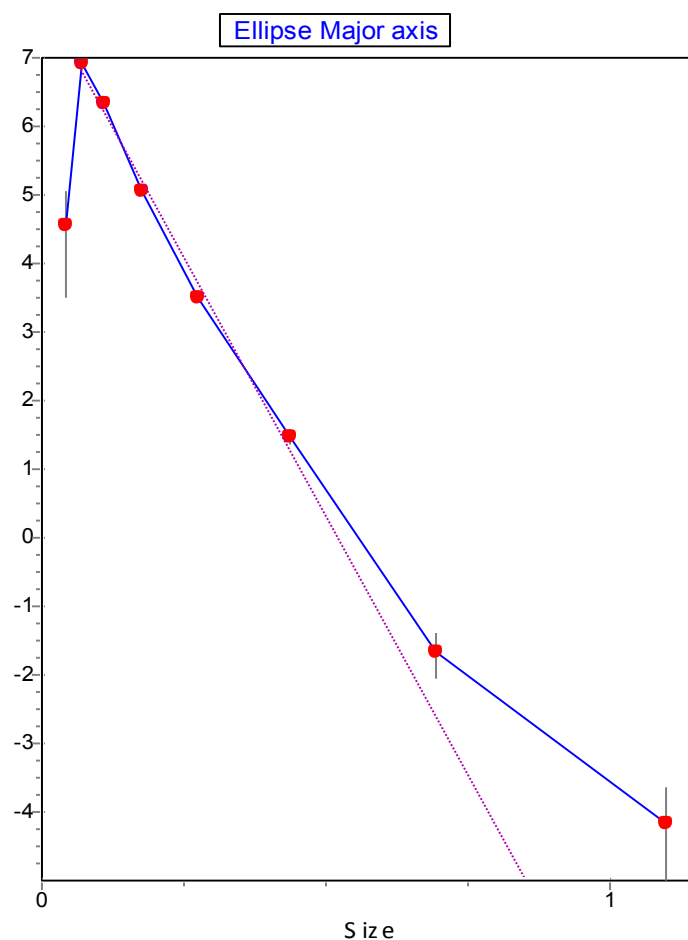

**Sample EJH/15/067B, Feldspathic Orthopyroxenite – Orthopyroxene.**

| Mid Inter | ln(pop den) | ln(min PD) | ln(max PD) | Cry num | Vol % |
|-----------|-------------|------------|------------|---------|-------|
| 4.9       | -7.29       | -7.98      | -6.88      | 0.00154 | 10.62 |
| 3.09      | -4.52       | -4.74      | -4.33      | 0.0156  | 26.97 |
| 1.95      | -2.85       | -3         | -2.72      | 0.0518  | 22.56 |
| 1.23      | -1.62       | -1.75      | -1.5       | 0.113   | 12.33 |
| 0.777     | -1.65       | -1.91      | -1.44      | 0.0687  | 1.886 |
| 0.49      | Over        |            |            |         |       |
| 0.309     | Over        |            |            |         |       |
| 0.195     | Over        |            |            |         |       |
| 0.123     | Over        |            |            |         |       |
| 0.0777    | Over        |            |            |         |       |
| 0.049     | Over        |            |            |         |       |
| 0.0309    | Over        |            |            |         |       |
| 0.0195    | Over        |            |            |         |       |
| 0.0123    | Over        |            |            |         |       |

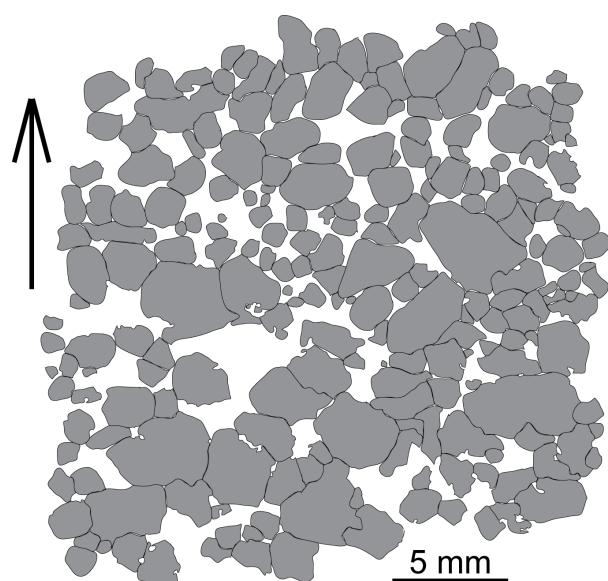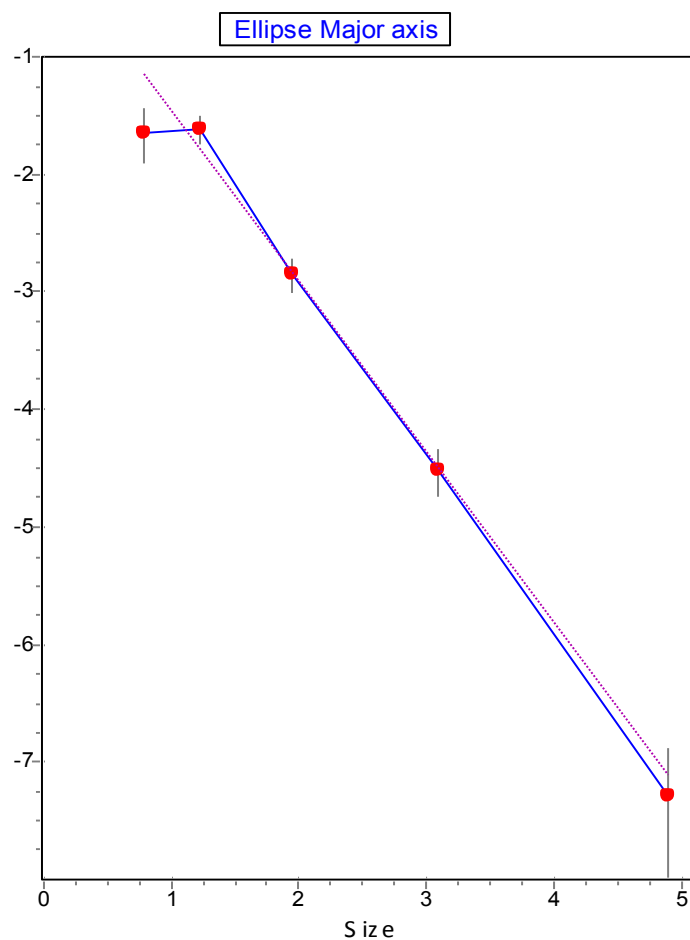

**Sample E/JH/15/068, Feldspathic Orthopyroxenite – Orthopyroxene.**

| Mid Inter | ln(pop den) | ln(min PD) | ln(max PD) | Cry num | Vol % |
|-----------|-------------|------------|------------|---------|-------|
| 3.13      | -4.88       | -5.06      | -4.73      | 0.0109  | 19.7  |
| 1.98      | -2.58       | -2.67      | -2.5       | 0.0688  | 31.12 |
| 1.25      | -1.66       | -1.75      | -1.58      | 0.109   | 12.39 |
| 0.787     | -1.72       | -1.9       | -1.57      | 0.0648  | 1.849 |
| 0.496     | -3.69       | -          | -2.71      | 0.00569 | 0.04  |
| 0.313     | Over        |            |            |         |       |
| 0.198     | Over        |            |            |         |       |
| 0.125     | Over        |            |            |         |       |
| 0.0787    | Over        |            |            |         |       |
| 0.0496    | Over        |            |            |         |       |
| 0.0313    | Over        |            |            |         |       |
| 0.0198    | Over        |            |            |         |       |
| 0.0125    | Over        |            |            |         |       |

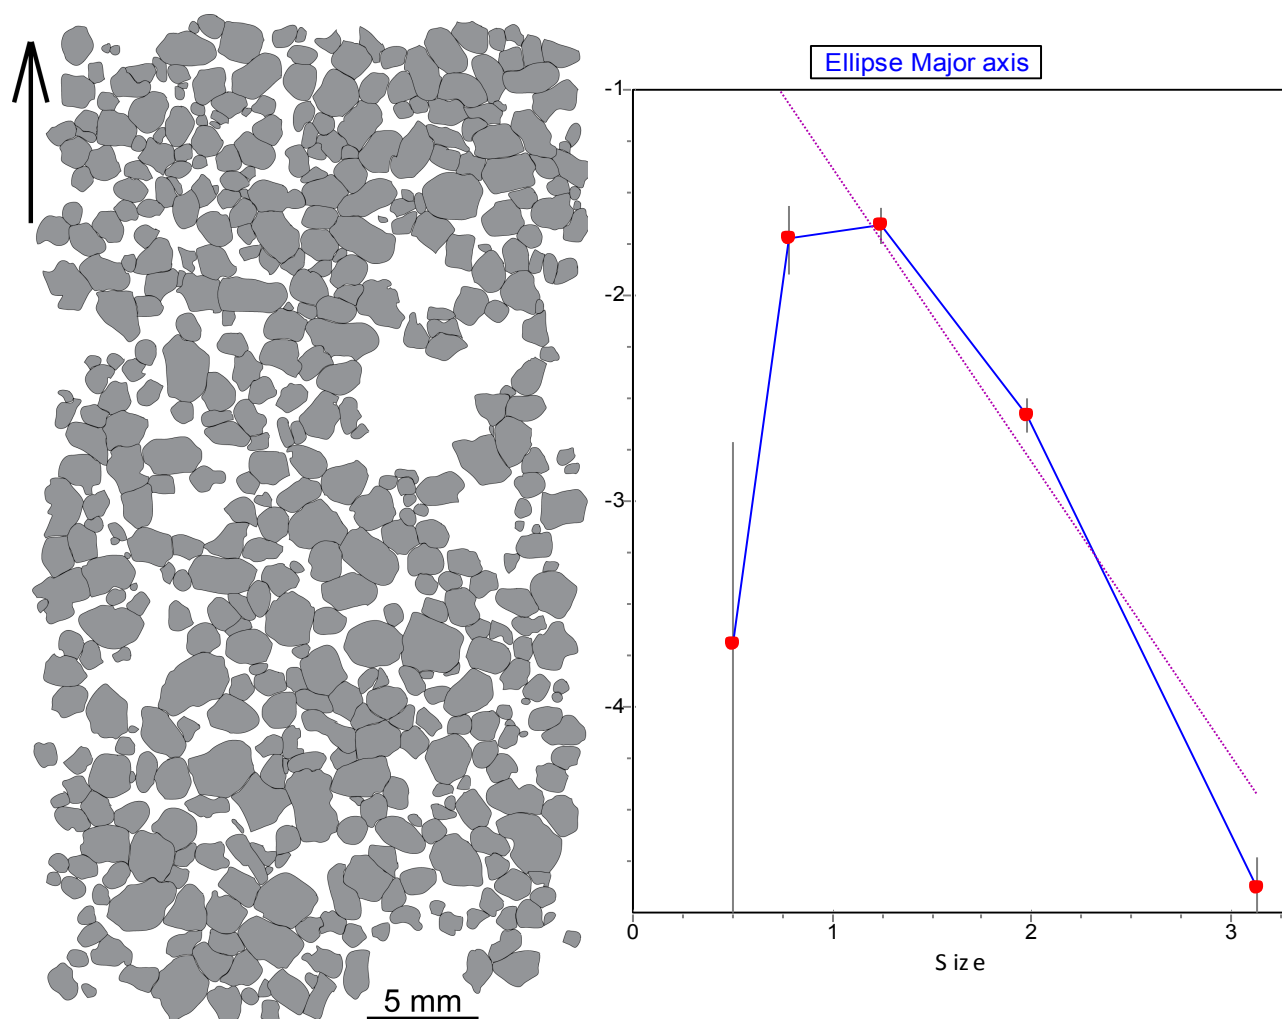

**Sample E/JH/15/069A, Feldspathic Orthopyroxenite – Orthopyroxene.**

| Mid Inter | ln(pop den) | ln(min PD) | ln(max PD) | Cry num  | Vol % |
|-----------|-------------|------------|------------|----------|-------|
| 7.82      | -10.17      | #NAME?     | -9.48      | 0.000138 | 3.859 |
| 4.93      | -6.77       | -7.12      | -6.52      | 0.0026   | 18.24 |
| 3.11      | -4.63       | -4.8       | -4.48      | 0.014    | 24.74 |
| 1.96      | -3.51       | -3.67      | -3.37      | 0.027    | 11.96 |
| 1.24      | -2.97       | -3.19      | -2.79      | 0.0293   | 3.263 |
| 0.782     | -2.89       | -3.3       | -2.6       | 0.02     | 0.558 |
| 0.493     | Over        |            |            |          |       |
| 0.311     | Over        |            |            |          |       |
| 0.196     | Over        |            |            |          |       |
| 0.124     | Over        |            |            |          |       |
| 0.0782    | Over        |            |            |          |       |
| 0.0493    | Over        |            |            |          |       |
| 0.0311    | Over        |            |            |          |       |
| 0.0196    | Over        |            |            |          |       |
| 0.0124    | Over        |            |            |          |       |

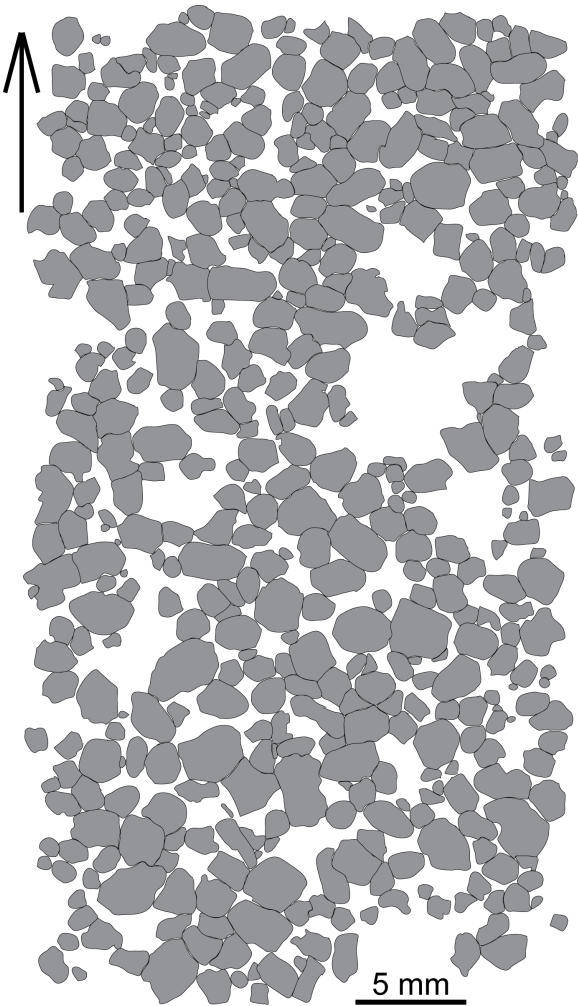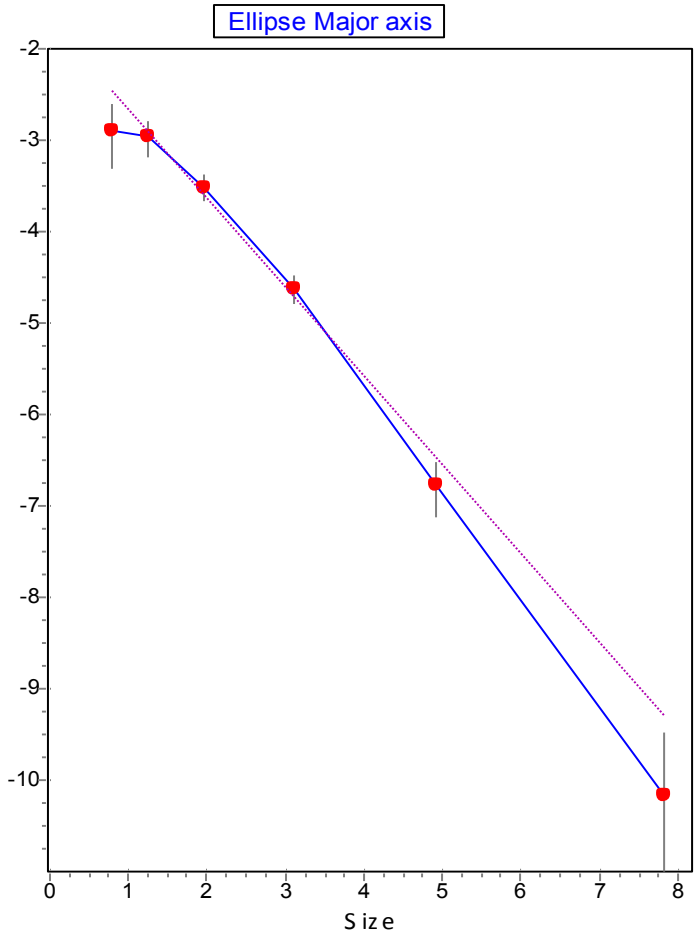

**Sample E/JH/15/069B, Chromitite – Cr-spinel.**

| Mid Inter | ln(pop den) | ln(min PD) | ln(max PD) | Cry num | Vol % |
|-----------|-------------|------------|------------|---------|-------|
| 1.1       | -4.18       | -          | -3.48      | 0.00781 | 1.046 |
| 0.696     | -1.9        | -2.62      | -1.48      | 0.048   | 1.616 |
| 0.439     | 0.58        | 0.31       | 0.79       | 0.362   | 3.06  |
| 0.277     | 3.27        | 3.17       | 3.37       | 3.37    | 7.158 |
| 0.175     | 5.12        | 5.05       | 5.18       | 13.4    | 7.159 |
| 0.11      | 6.62        | 6.57       | 6.67       | 38.1    | 5.108 |
| 0.0696    | 7.47        | 7.42       | 7.52       | 56.2    | 1.892 |
| 0.0439    | 6.49        | 6.27       | 6.67       | 13.3    | 0.112 |
| 0.0277    | Over        |            |            |         |       |
| 0.0175    | Over        |            |            |         |       |
| 0.011     | Over        |            |            |         |       |
| 0.007     | Over        |            |            |         |       |
| 0.0044    | Over        |            |            |         |       |
| 0.0028    | Over        |            |            |         |       |
| 0.0017    | Over        |            |            |         |       |

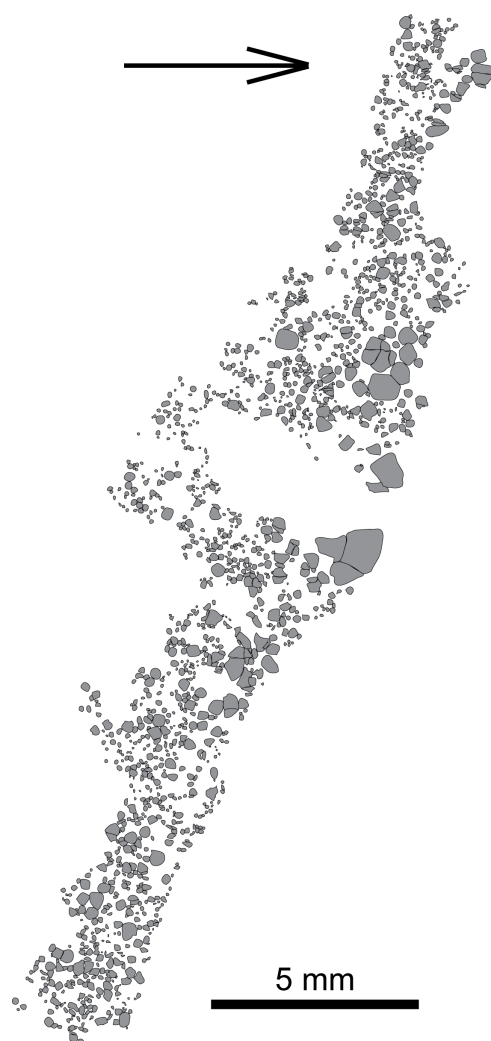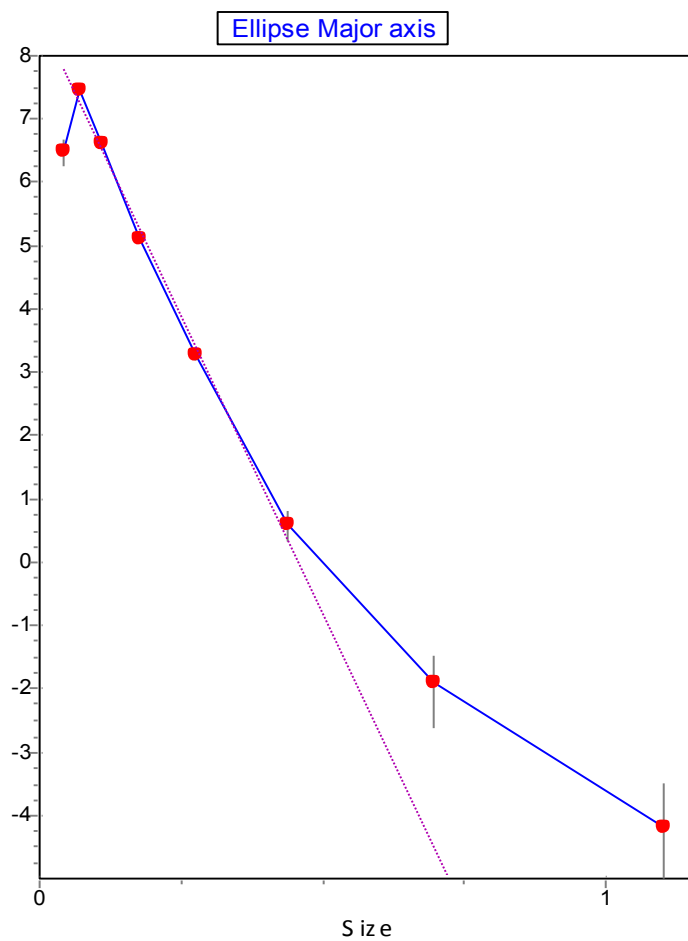

**Sample EJH/15/070, Feldspathic Orthopyroxenite – Orthopyroxene.**

| Mid Inter | ln(pop den) | ln(min PD) | ln(max PD) | Cry num | Vol % |
|-----------|-------------|------------|------------|---------|-------|
| 4.81      | -6.43       | -6.72      | -6.21      | 0.00355 | 23.12 |
| 3.03      | -4.19       | -4.33      | -4.07      | 0.0212  | 34.59 |
| 1.91      | -3.42       | -3.58      | -3.28      | 0.0289  | 11.88 |
| 1.21      | -3.21       | -3.48      | -3         | 0.0224  | 2.313 |
| 0.762     | -2.53       | -2.85      | -2.29      | 0.0279  | 0.722 |
| 0.481     | Over        |            |            |         |       |
| 0.303     | Over        |            |            |         |       |
| 0.191     | Over        |            |            |         |       |
| 0.121     | Over        |            |            |         |       |
| 0.0762    | Over        |            |            |         |       |
| 0.0481    | Over        |            |            |         |       |
| 0.0303    | Over        |            |            |         |       |
| 0.0191    | Over        |            |            |         |       |
| 0.0121    | Over        |            |            |         |       |

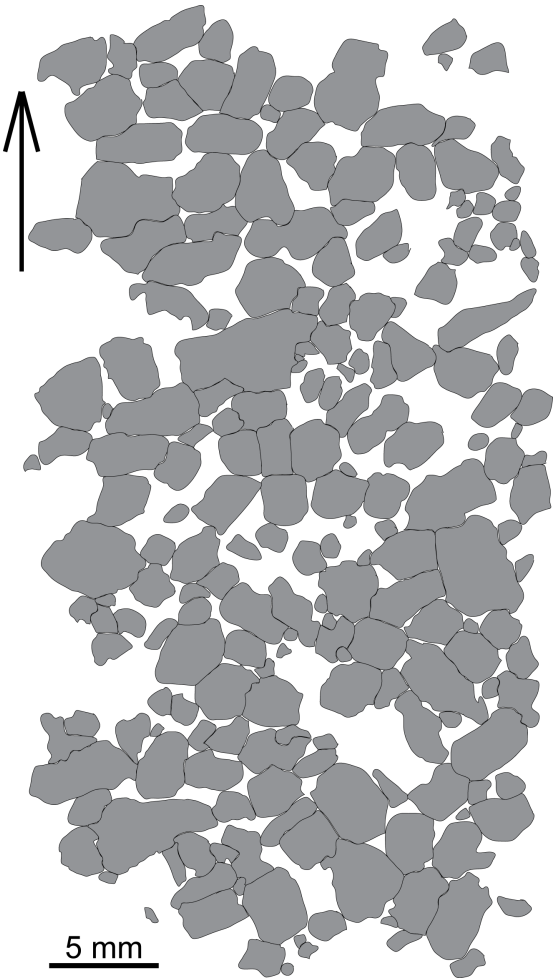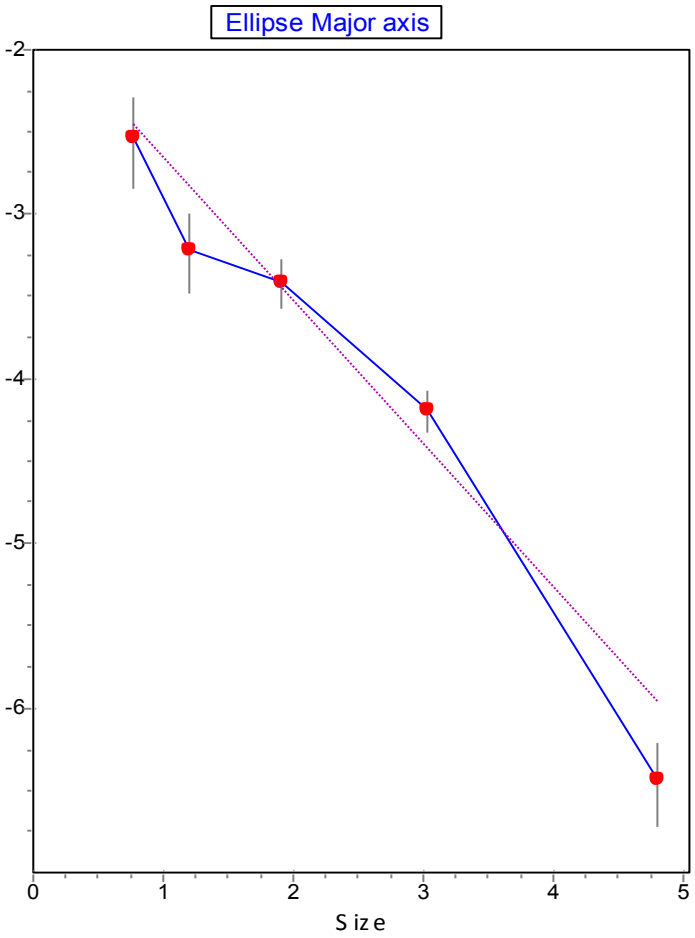

**Sample EJH/15/071, Leuconorite – Plagioclase.**

| Mid Inter | ln(pop den) | ln(min PD) | ln(max PD) | Cry num | Vol % |
|-----------|-------------|------------|------------|---------|-------|
| 2.74      | -5.69       | -6.38      | -5.28      | 0.00428 | 5.889 |
| 1.73      | -2.53       | -2.71      | -2.38      | 0.0636  | 21.99 |
| 1.09      | -0.62       | -0.72      | -0.52      | 0.272   | 23.6  |
| 0.689     | 1.01        | 0.94       | 1.08       | 0.872   | 19.04 |
| 0.435     | 2.02        | 1.94       | 2.09       | 1.51    | 8.267 |
| 0.274     | 2.27        | 2.15       | 2.38       | 1.23    | 1.687 |
| 0.173     | 1.98        | 1.68       | 2.2        | 0.575   | 0.198 |
| 0.109     | Over        |            |            |         |       |
| 0.0689    | Over        |            |            |         |       |
| 0.0435    | Over        |            |            |         |       |
| 0.0274    | Over        |            |            |         |       |
| 0.0173    | Over        |            |            |         |       |
| 0.0109    | Over        |            |            |         |       |

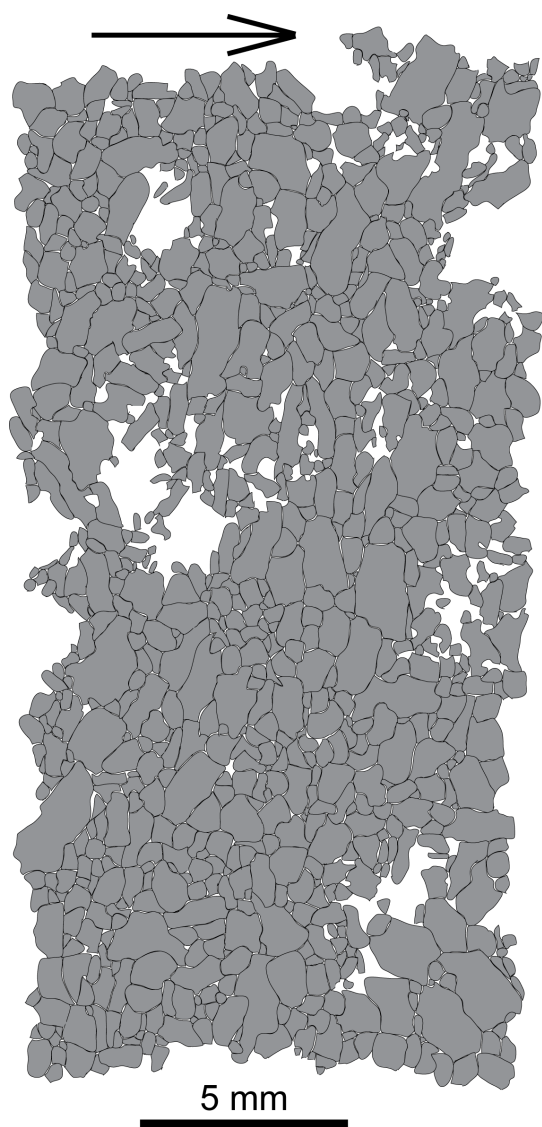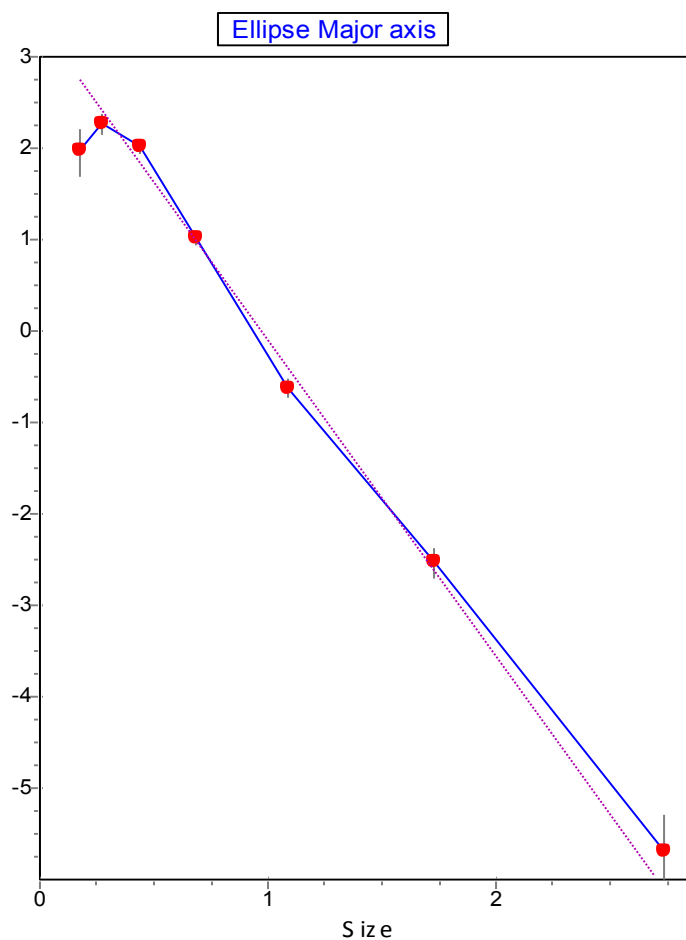

**Sample EJH/15/072, Poikilitic Anorthosite – Plagioclase.**

| Mid Inter | ln(pop den) | ln(min PD) | ln(max PD) | Cry num | Vol % |
|-----------|-------------|------------|------------|---------|-------|
| 2.82      | -5.85       | -6.54      | -5.44      | 0.00376 | 5.65  |
| 1.78      | -2.66       | -2.84      | -2.51      | 0.0575  | 21.66 |
| 1.12      | -0.43       | -0.52      | -0.35      | 0.336   | 31.83 |
| 0.709     | 1.07        | 1.01       | 1.14       | 0.957   | 22.76 |
| 0.448     | 1.7         | 1.61       | 1.77       | 1.12    | 6.716 |
| 0.282     | 1.65        | 1.48       | 1.79       | 0.676   | 1.015 |
| 0.178     | Over        |            |            |         |       |
| 0.112     | Over        |            |            |         |       |
| 0.0709    | Over        |            |            |         |       |
| 0.0448    | Over        |            |            |         |       |
| 0.0282    | Over        |            |            |         |       |
| 0.0178    | Over        |            |            |         |       |
| 0.0112    | Over        |            |            |         |       |

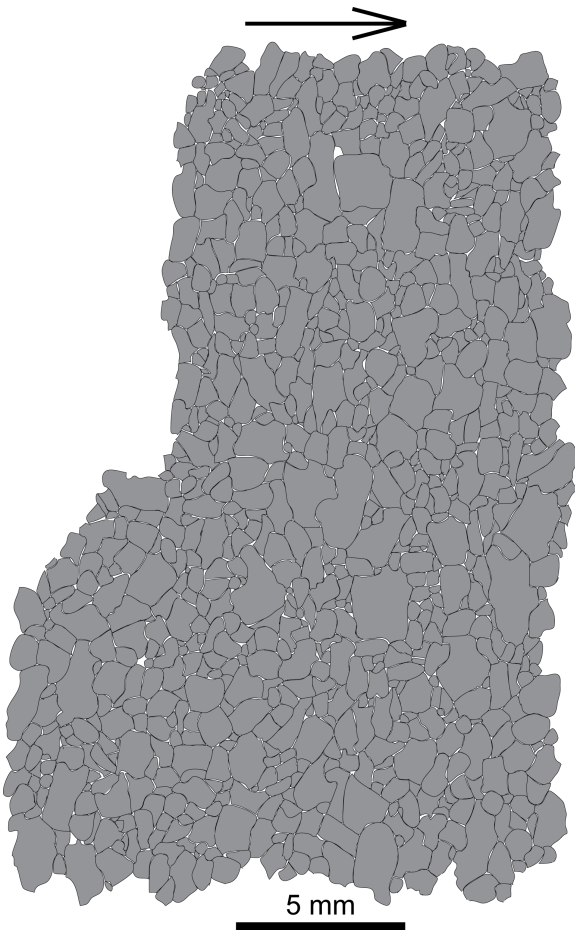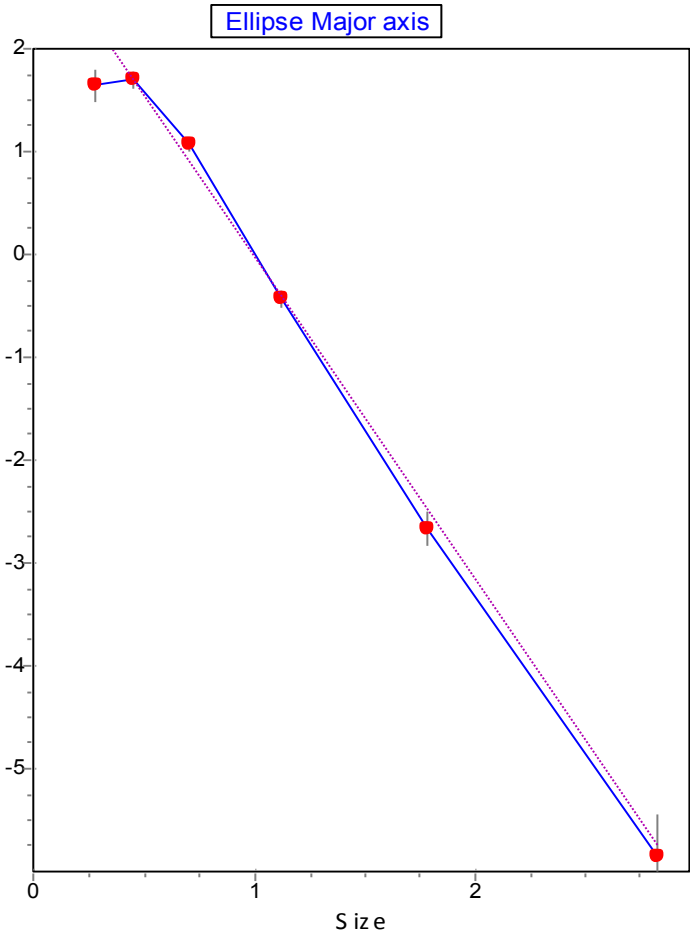

**Sample EJH/15/072, Poikilitic Anorthosite – Plagioclase Chadacrysts.**

| Mid Inter | ln(pop den) | ln(min PD) | ln(max PD) | Cry num | Vol % |
|-----------|-------------|------------|------------|---------|-------|
| 2.65      | -6.9        | #NAME?     | -6.2       | 0.00123 | 1.525 |
| 1.67      | -2.89       | -3.13      | -2.69      | 0.0428  | 13.28 |
| 1.05      | -0.37       | -0.47      | -0.28      | 0.335   | 26.15 |
| 0.665     | 1.02        | 0.94       | 1.1        | 0.85    | 16.64 |
| 0.419     | 2.28        | 2.21       | 2.35       | 1.89    | 9.308 |
| 0.265     | 2.91        | 2.83       | 2.99       | 2.24    | 2.771 |
| 0.167     | 3.47        | 3.36       | 3.57       | 2.47    | 0.766 |
| 0.105     | Over        |            |            |         |       |
| 0.0665    | Over        |            |            |         |       |
| 0.0419    |             |            |            |         |       |
| 0.0265    | Over        |            |            |         |       |
| 0.0167    | Over        |            |            |         |       |
| 0.0105    | Over        |            |            |         |       |

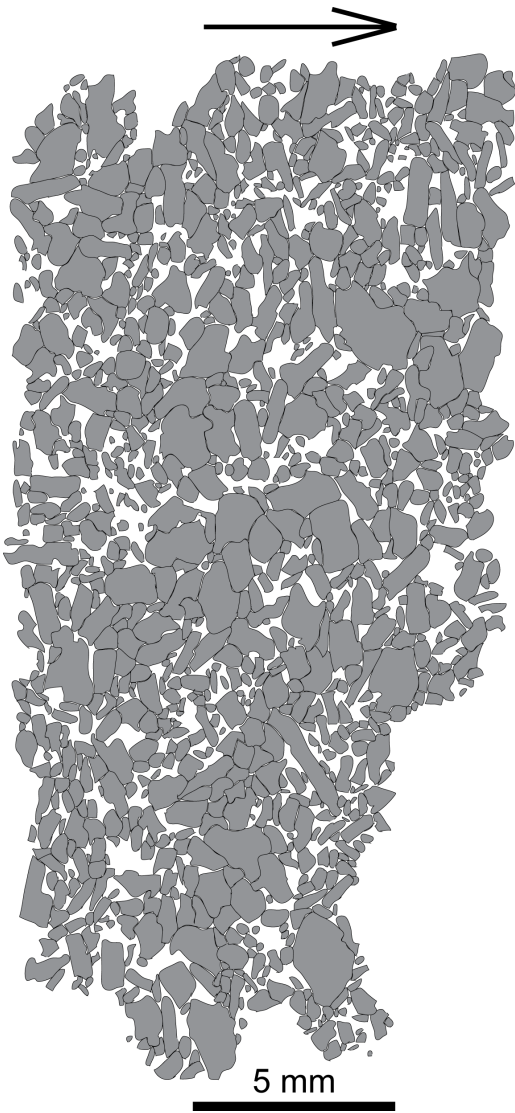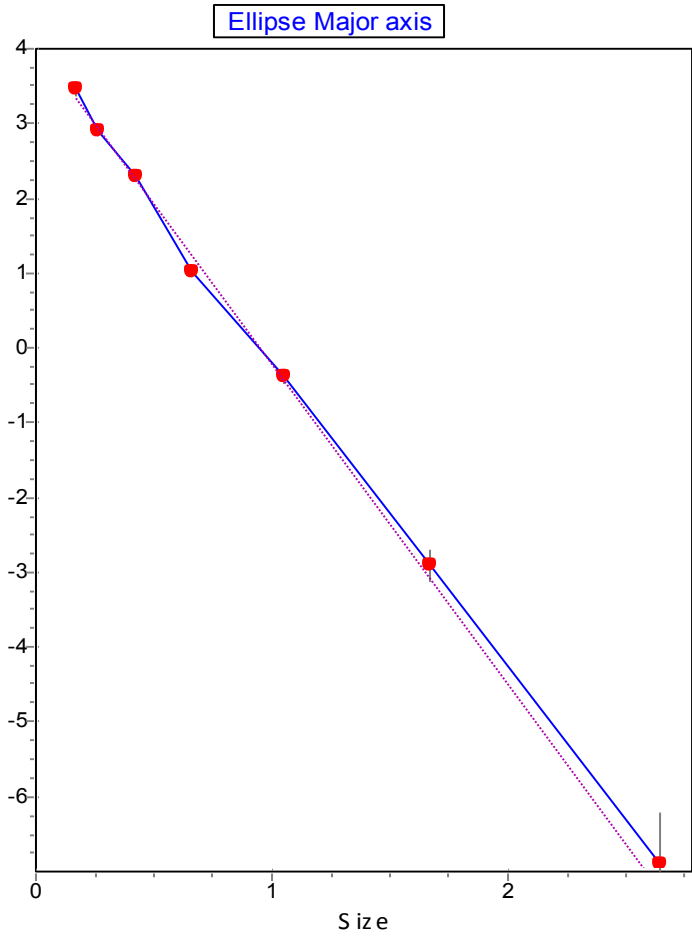

Supplement: s1 [file s1 › Hunt MCU Minerals Supplementary Material Raw CSD Data.pdf]
