# Supplementary material
Source: MDPI journal article supplement (https://www.mdpi.com/2075-163X/8/4/144)
Supplement: s1 [file s1]

Archive with 3 entries (3 files):
- Hunt MCU Minerals Supplementary Material Element Maps.pdf
- Hunt MCU Minerals Supplementary Material Raw CSD Data.pdf
- Hunt MCU Minerals Supplementary Material Table S1 EPMA Data.pdf
