# Supplementary material
Source: MDPI journal article supplement (https://www.mdpi.com/2075-163X/8/4/144)
Supplement: s1 [file s1 › Hunt MCU Minerals Supplementary Material Element Maps.pdf]

Sample EJH/15/068: Feldspathic Orthopyroxenite

Thin section photomicrograph under DIC

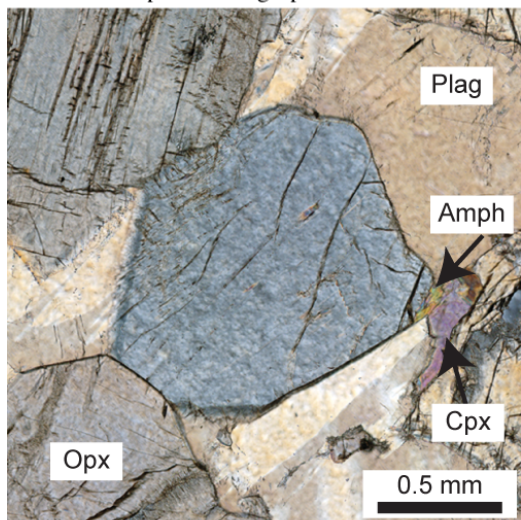

Ca K $\alpha$ , 15 kV

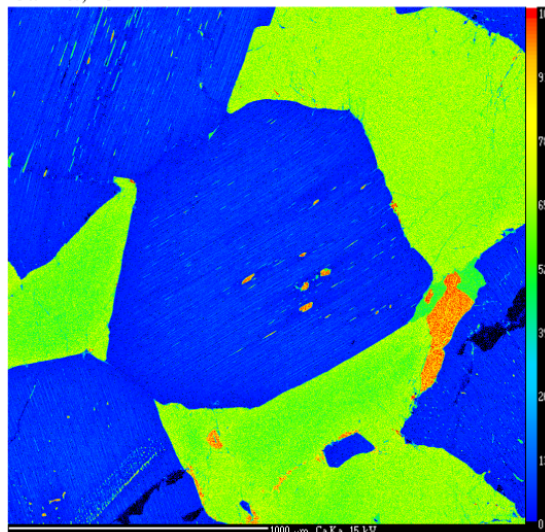

Fe K $\alpha$ , 15 kV

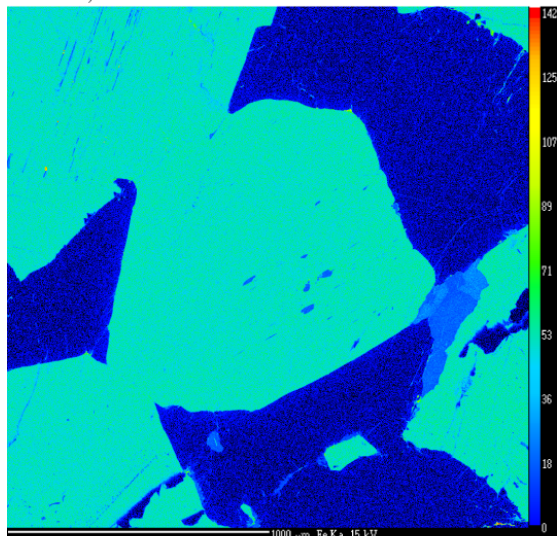

Al K $\alpha$ , 15 kV

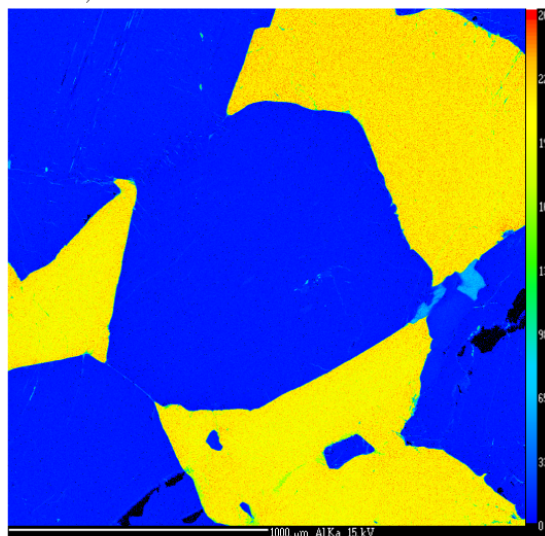

Cr K $\alpha$ , 15 kV

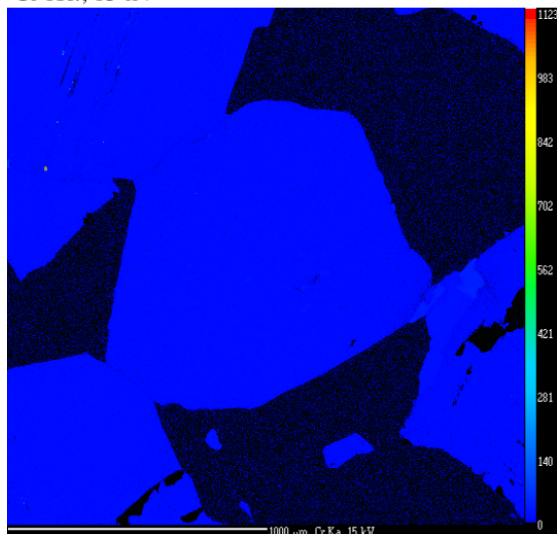

Figure S1: element maps for sample EJH/15/068, feldspathic orthopyroxenite with comparison photomicrograph of mapped area. DIC = differential interference contrast as an approximation of circularly polarised light.

Sample EJH/15/071: HW 1 Leuconorite groundmass

Thin section photomicrograph under DIC

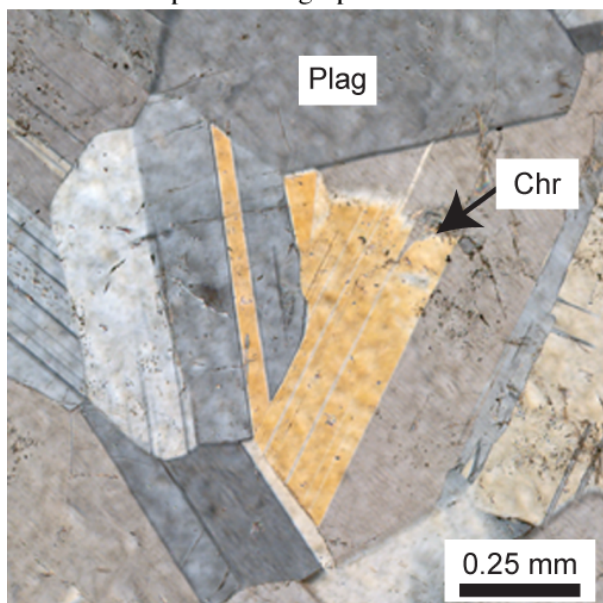

Ca K $\alpha$ , 15 kV

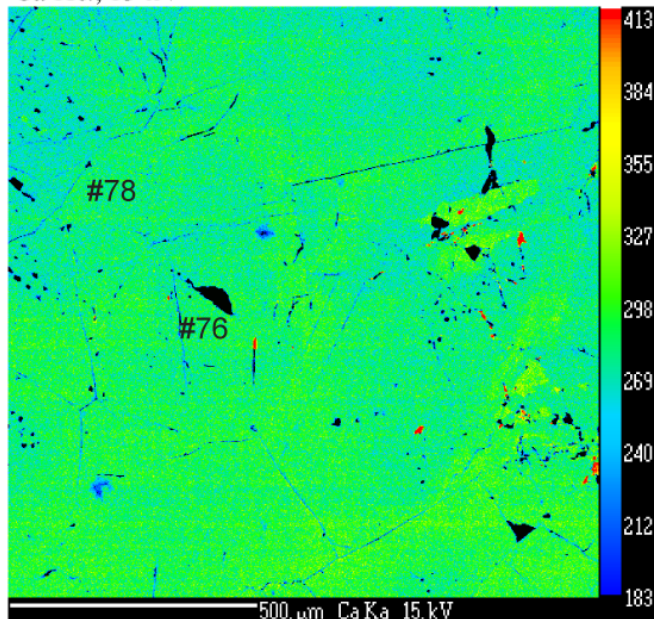

Fe K $\alpha$ , 15 kV

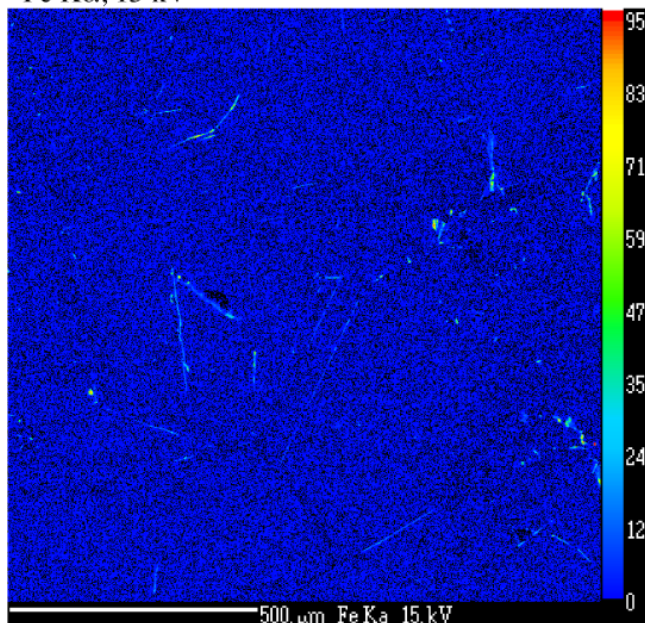

Al K $\alpha$ , 15 kV

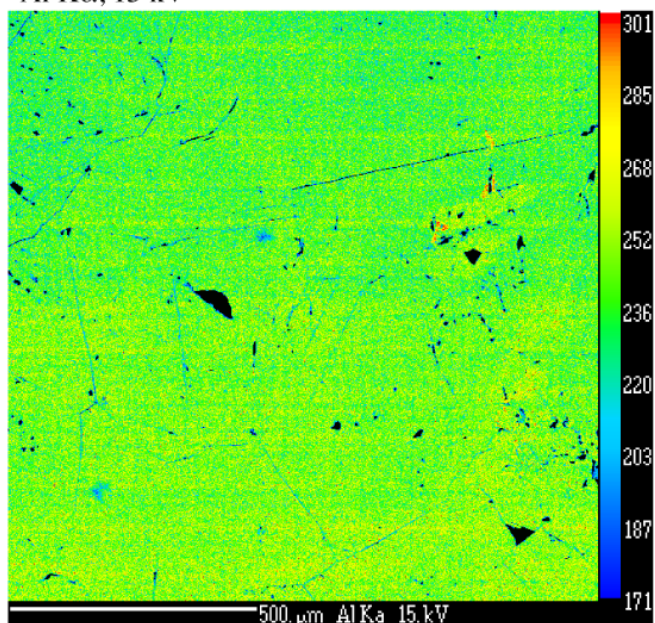

Figure S2: element maps for sample EJH/15/071, HW1 leuconorite groundmass with comparison photomicrograph of mapped area. Anorthite contents (#) measured through electronprobe microanalysis, data are located in Table S1 in the online supplementary materials. DIC = differential interference contrast as an approximation of circularly polarised light.

Sample EJH/15/071: HW 1 Leuconorite orthopyroxene

Thin section photomicrograph under DIC

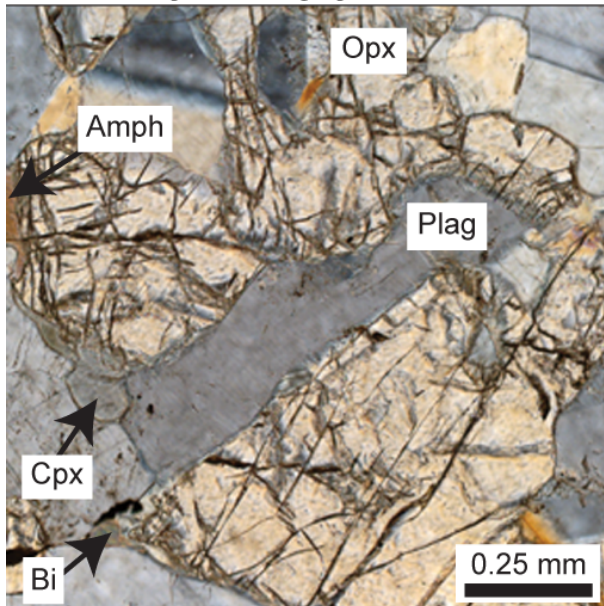

Ca K $\alpha$ , 15 kV

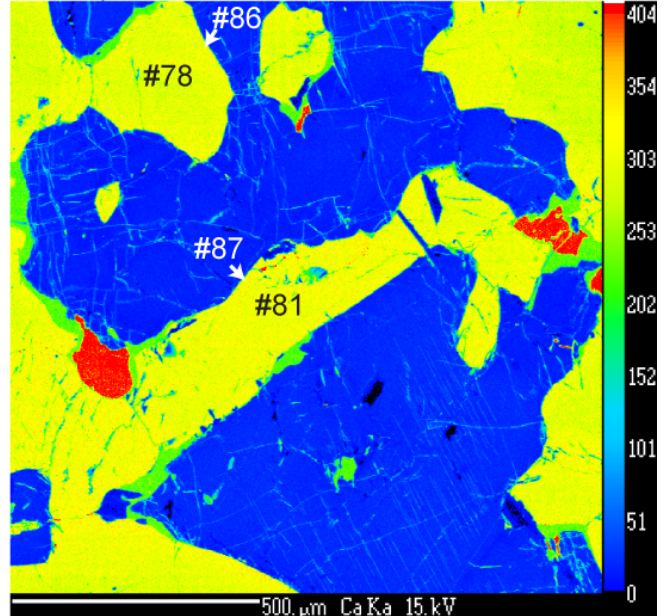

Fe K $\alpha$ , 15 kV

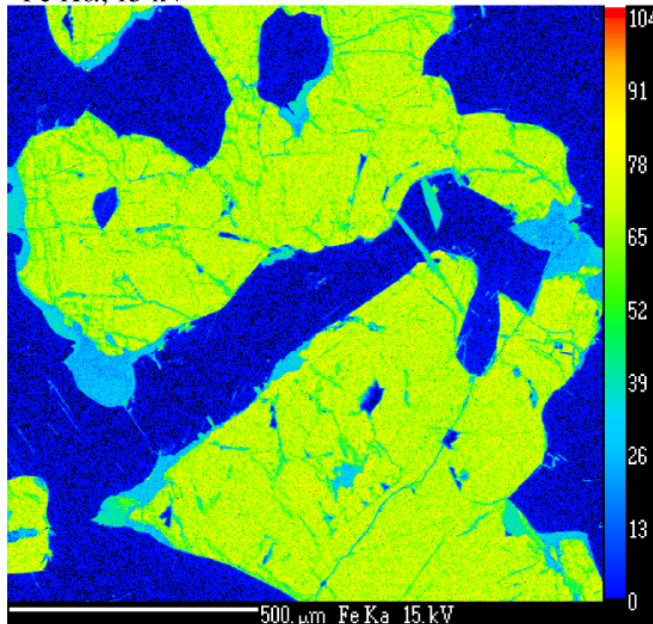

Al K $\alpha$ , 15 kV

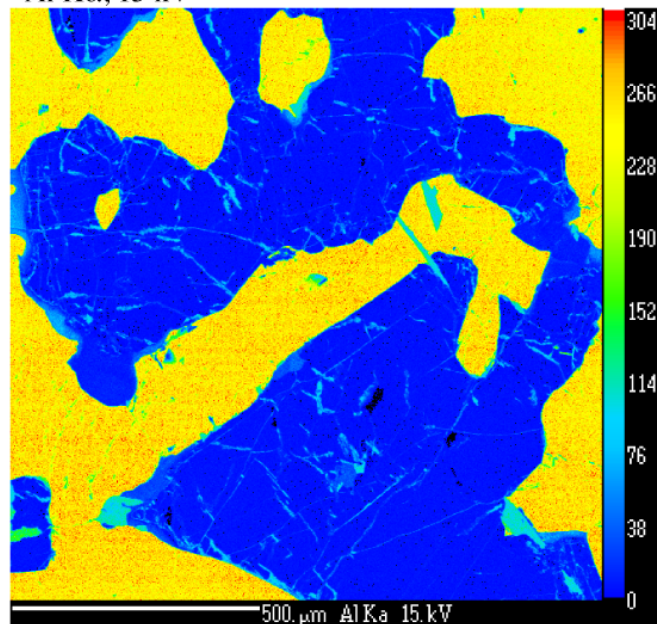

Figure S3: element maps for sample EJH/15/071, HW1 leuconorite orthopyroxene with comparison photomicrograph of mapped area. Anorthite contents (#) measured through electronprobe microanalysis, data are located in Table S1 in the online supplementary materials. DIC = differential interference contrast as an approximation of circularly polarised light.

Sample EJH/15/072: HW 2 Poikilitic Anorthosite groundmass

Thin section photomicrograph under DIC

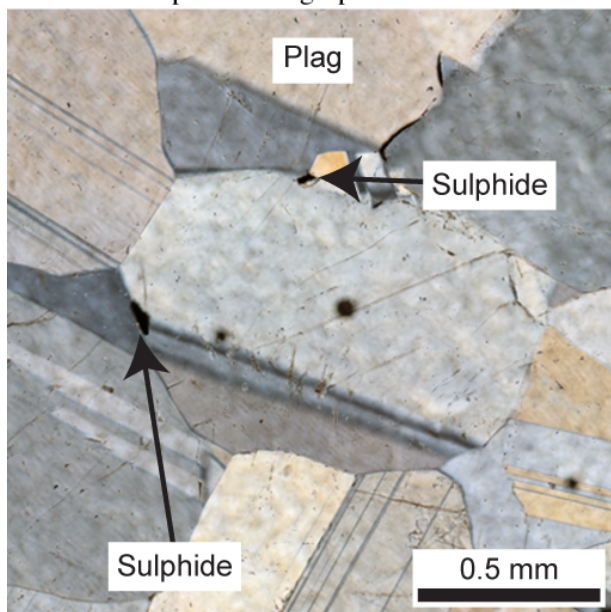

Ca K $\alpha$ , 15 kV

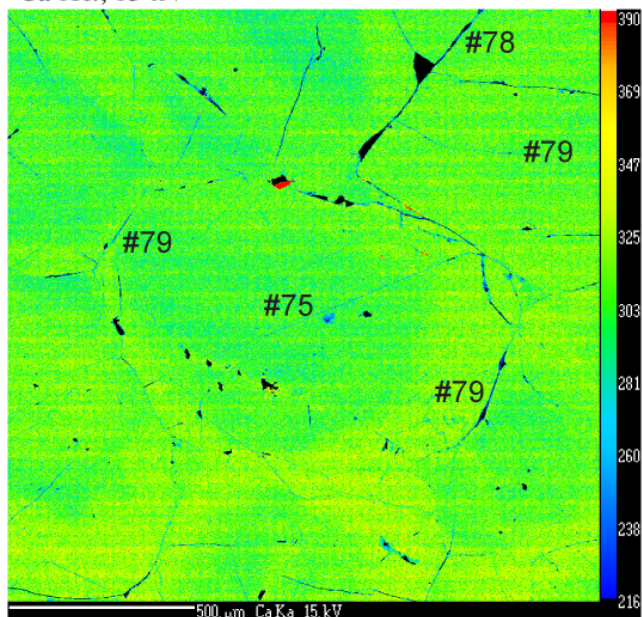

Fe K $\alpha$ , 15 kV

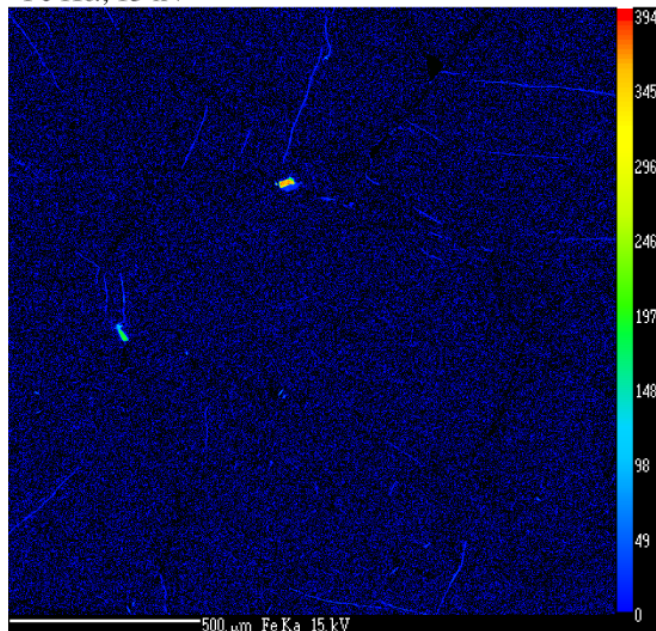

Al K $\alpha$ , 15 kV

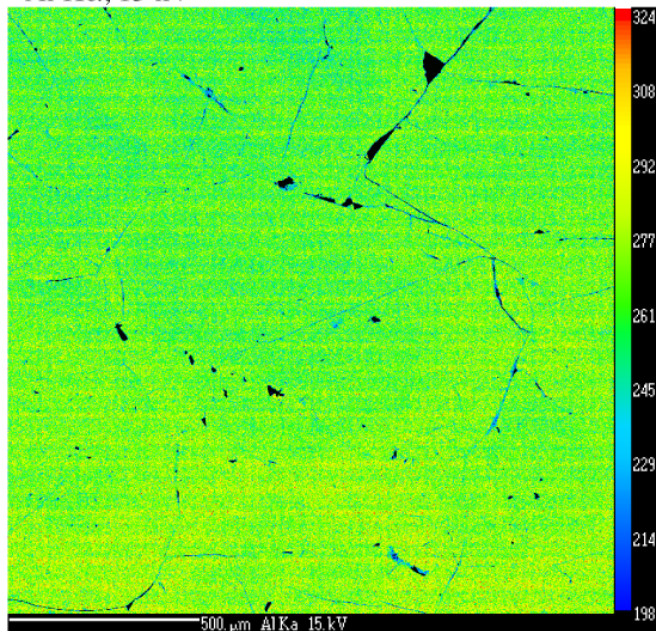

Figure S4: element maps for sample EJH/15/072, HW2 poikilitic anorthosite groundmass with comparison photomicrograph of mapped area. Anorthite contents (#) measured through electronprobe microanalysis, data are located in Table S1 in the online supplementary materials. DIC = differential interference contrast as an approximation of circularly polarised light.

Sample EJH/15/072: HW 2 Poikilitic Anorthosite oikocryst

Thin section photomicrograph under DIC

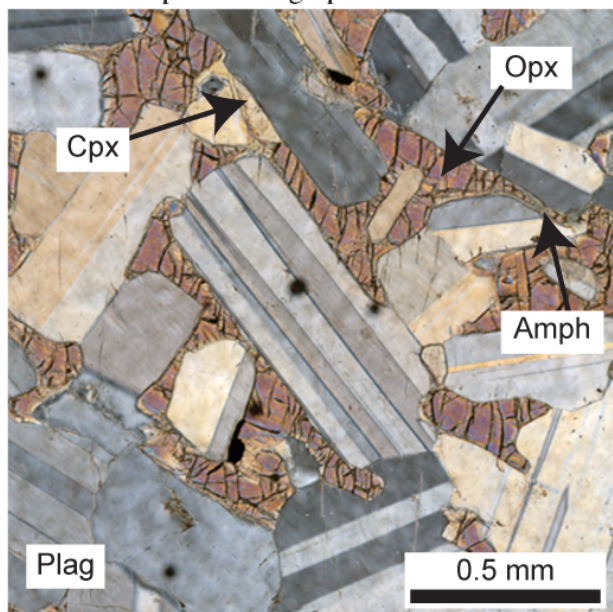

Ca K $\alpha$ , 15 kV

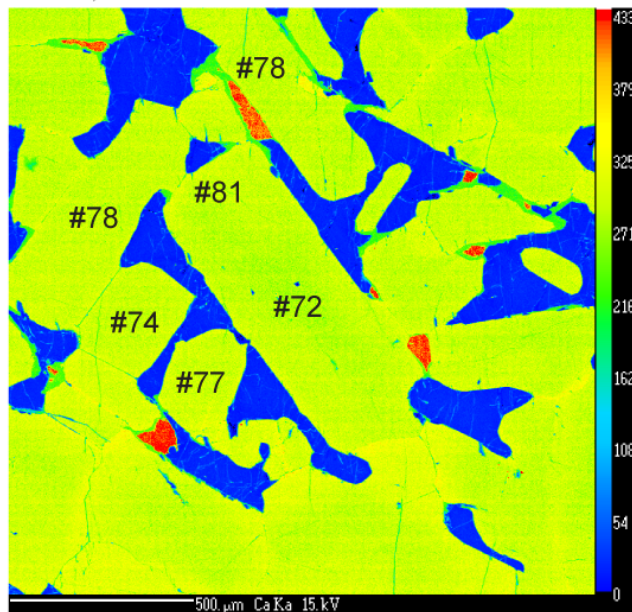

Fe K $\alpha$ , 15 kV

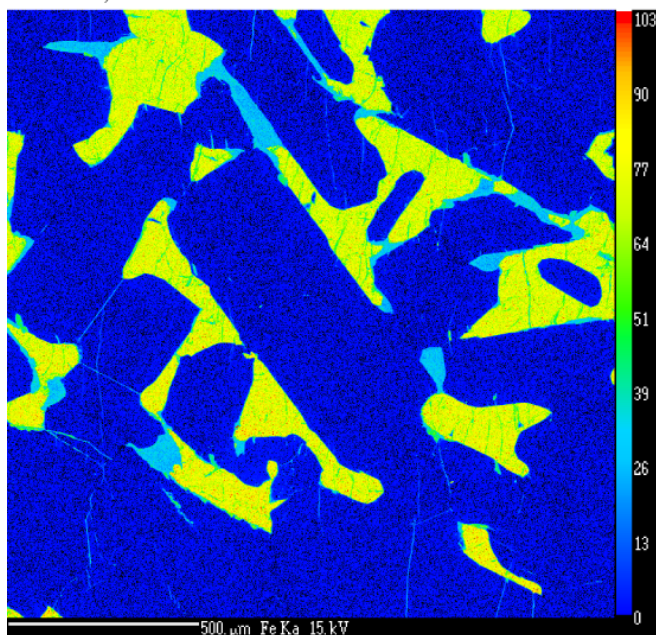

Al K $\alpha$ , 15 kV

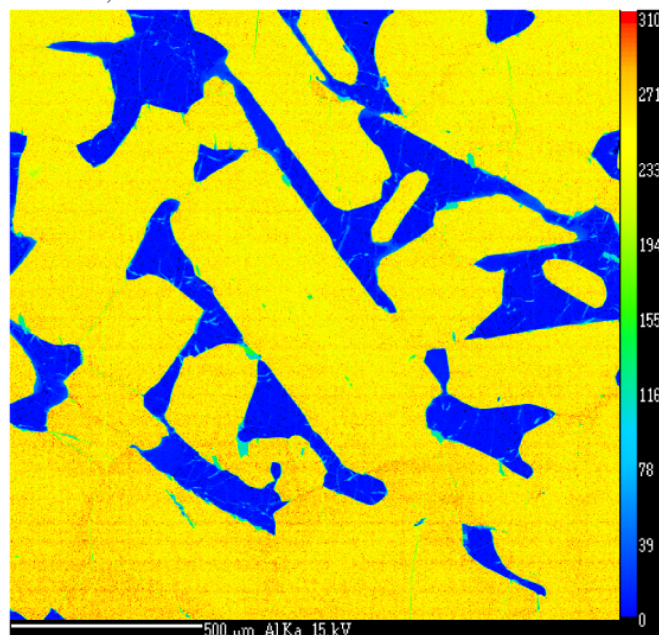

Figure S5: element maps for sample EJH/15/072, HW2 poikilitic anorthosite oikocryst with comparison photomicrograph of mapped area. Anorthite contents (#) measured through electronprobe microanalysis, data are located in Table S1 in the online supplementary materials. DIC = differential interference contrast as an approximation of circularly polarised light.
