# Supplementary material
Source: MDPI journal article supplement (https://www.mdpi.com/2075-163X/8/4/144)
Supplement: s1 [file s1 › Hunt MCU Minerals Supplementary Material Table S1 EPMA Data.pdf]

Table S1: Electron probe microanalysis was performed using a Cameca SX-5FE electron probe microanalyser equipped with 5 WDS spectrometers housed at the MMU (Microscopy and Microanalysis Unit) of the University of the Witwatersrand. Analytical conditions were 15 kV acceleration voltage and 20 nA beam current with a 5 µm diameter electron beam. Natural and synthetic standards were used for calibration.

| Sample                                                   | SiO <sub>2</sub> | Al <sub>2</sub> O <sub>3</sub> | FeO  | CaO   | Na <sub>2</sub> O | K <sub>2</sub> O | Total  | Si    | Al    | Fe    | Ca    | Na    | K     | Total | Ab    | An    | Or   |
|----------------------------------------------------------|------------------|--------------------------------|------|-------|-------------------|------------------|--------|-------|-------|-------|-------|-------|-------|-------|-------|-------|------|
| <b>071 – groundmass</b>                                  |                  |                                |      |       |                   |                  |        |       |       |       |       |       |       |       |       |       |      |
| Core                                                     | 48.25            | 32.29                          | 0.17 | 15.18 | 2.54              | 0.09             | 98.52  | 2.238 | 1.765 | 0.007 | 0.754 | 0.228 | 0.005 | 4.997 | 23.12 | 76.34 | 0.54 |
| Rim                                                      | 48.49            | 32.96                          | 0.16 | 15.93 | 2.38              | 0.05             | 99.96  | 2.219 | 1.778 | 0.006 | 0.781 | 0.211 | 0.003 | 4.999 | 21.22 | 78.49 | 0.29 |
| <b>071 – hosted within orthopyroxene</b>                 |                  |                                |      |       |                   |                  |        |       |       |       |       |       |       |       |       |       |      |
| Core                                                     | 48.53            | 33.02                          | 0.09 | 15.93 | 2.39              | 0.09             | 100.05 | 2.219 | 1.780 | 0.003 | 0.780 | 0.212 | 0.005 | 5.000 | 21.24 | 78.23 | 0.53 |
|                                                          | 47.43            | 33.33                          | 0.17 | 16.26 | 2.12              | 0.05             | 99.37  | 2.188 | 1.812 | 0.007 | 0.804 | 0.190 | 0.003 | 5.002 | 19.03 | 80.67 | 0.30 |
| Rim                                                      | 46.28            | 34.14                          | 0.26 | 17.09 | 1.52              | 0.04             | 99.34  | 2.141 | 1.861 | 0.010 | 0.847 | 0.136 | 0.002 | 4.998 | 13.83 | 85.93 | 0.24 |
|                                                          | 46.84            | 31.21                          | 5.32 | 15.55 | 1.31              | 0.01             | 100.26 | 2.188 | 1.718 | 0.208 | 0.778 | 0.119 | 0.001 | 5.012 | 13.22 | 86.71 | 0.07 |
| <b>072 – groundmass</b>                                  |                  |                                |      |       |                   |                  |        |       |       |       |       |       |       |       |       |       |      |
| Core                                                     | 48.05            | 32.62                          | 0.25 | 15.91 | 2.30              | 0.13             | 99.26  | 2.218 | 1.774 | 0.010 | 0.787 | 0.206 | 0.008 | 5.002 | 20.58 | 78.66 | 0.77 |
|                                                          | 49.11            | 31.86                          | 0.30 | 15.39 | 2.72              | 0.14             | 99.52  | 2.258 | 1.726 | 0.012 | 0.758 | 0.242 | 0.008 | 5.004 | 24.04 | 75.15 | 0.81 |
| Rim                                                      | 48.23            | 32.79                          | 0.24 | 16.33 | 2.52              | 0.07             | 100.19 | 2.210 | 1.771 | 0.009 | 0.802 | 0.224 | 0.004 | 5.019 | 21.74 | 77.86 | 0.40 |
|                                                          | 48.69            | 32.72                          | 0.22 | 16.24 | 2.38              | 0.06             | 100.30 | 2.224 | 1.761 | 0.008 | 0.795 | 0.211 | 0.003 | 5.003 | 20.89 | 78.76 | 0.35 |
|                                                          | 47.73            | 32.60                          | 0.27 | 16.10 | 2.32              | 0.11             | 99.14  | 2.209 | 1.778 | 0.010 | 0.798 | 0.208 | 0.006 | 5.010 | 20.55 | 78.81 | 0.64 |
| <b>072 – hosted within large orthopyroxene oikocryst</b> |                  |                                |      |       |                   |                  |        |       |       |       |       |       |       |       |       |       |      |
| Core                                                     | 48.08            | 32.56                          | 0.17 | 15.90 | 2.39              | 0.13             | 99.23  | 2.220 | 1.771 | 0.007 | 0.786 | 0.214 | 0.008 | 5.006 | 21.22 | 78.02 | 0.76 |
|                                                          | 48.64            | 31.96                          | 0.23 | 15.20 | 2.91              | 0.12             | 99.06  | 2.247 | 1.740 | 0.009 | 0.752 | 0.261 | 0.007 | 5.017 | 25.55 | 73.75 | 0.69 |
|                                                          | 48.29            | 32.26                          | 0.23 | 15.74 | 2.55              | 0.10             | 99.17  | 2.230 | 1.756 | 0.009 | 0.779 | 0.228 | 0.006 | 5.009 | 22.54 | 76.88 | 0.58 |
|                                                          | 50.63            | 31.85                          | 0.27 | 15.14 | 3.13              | 0.16             | 101.18 | 2.286 | 1.695 | 0.010 | 0.733 | 0.274 | 0.009 | 5.008 | 26.98 | 72.11 | 0.91 |
|                                                          | 48.11            | 32.54                          | 0.19 | 15.94 | 2.53              | 0.04             | 99.36  | 2.219 | 1.769 | 0.007 | 0.788 | 0.226 | 0.002 | 5.011 | 22.26 | 77.51 | 0.23 |
| Rim                                                      | 47.68            | 33.56                          | 0.25 | 16.87 | 2.18              | 0.02             | 100.58 | 2.178 | 1.807 | 0.010 | 0.826 | 0.193 | 0.001 | 5.015 | 18.93 | 80.95 | 0.11 |
